# Supplementary material
Source: PubMed Central journal article supplement (PMC3072779)
Supplement: NIHMS279837-supplement-Supplement.pdf [file NIHMS279837-supplement-Supplement.pdf]

## Supplementary Materials for

### **Phosphoproteomic Analysis Reveals Interconnected System-Wide Responses to Perturbations of Kinases and Phosphatases in Yeast**

Bernd Bodenmiller, Stefanie Wanka, Claudine Kraft, Jörg Urban, David Campbell, Patrick G. Pedrioli, Bertran Gerrits, Paola Picotti, Henry Lam, Olga Vitek, Mi-Youn Brusniak, Bernd Roschitzki, Chao Zhang, Kevan M. Shokat, Ralph Schlapbach, Alejandro Colman-Lerner, Garry P. Nolan, Alexey I. Nesvizhskii, Matthias Peter, Robbie Loewith, Christian von Mering, Ruedi Aebersold\*

\*To whom correspondence should be addressed. E-mail: aebersold@imsb.biol.ethz.ch

Published 21 December 2010, *Sci. Signal.* **3**, rs4 (2010)

DOI: 10.1126/scisignal.2001182

#### **This PDF file includes:**

Materials and Methods

Fig. S1. Power of the analysis approach.

Fig. S2. Topological properties of the protein phosphorylation network.

Fig. S3. Abundance distribution of responder phosphoproteins (proteins that contain “regulated” phosphopeptides).

Fig. S4. Ratio of phosphopeptides that are reduced or increased in abundance.

Fig. S5. Regulation of phosphopeptides versus regulation of protein abundance.

Fig. S6. Regulation of phosphopeptides versus regulation of protein abundance.

Fig. S7. Regulation of phosphopeptides that map to the same protein.

Table S2. False discovery rate of peptide identification and specificity of phosphopeptide enrichment for each analyzed phosphorylation pattern.

Table S4. Significant coregulation of kinases and phosphatases.

Table S5. Overlap of data from this study with other data sets.

Table S7. Overlap of possible direct targets with other data sets.

Table S8. Effects of each kinase and phosphatase on the phosphoproteome.

Table S9. Enrichment of biological processes among the low-impact kinases (bottom half).

Table S10. Enrichment of biological processes among the high-impact kinases (top half).

Table S12. Overview of the entire data set.

References

#### **Other Supplementary Material for this manuscript includes the following:**

(available at [www.sciencesignaling.org/cgi/content/full/3/153/rs4/DC1](http://www.sciencesignaling.org/cgi/content/full/3/153/rs4/DC1))

Table S1 (Microsoft Excel format). List of enzymes.

Table S3 (Microsoft Excel format). Information on phosphopeptides and phosphoproteins.

Table S6 (Microsoft Excel format). Confirmed STRING interactions.

Table S11 (Microsoft Excel format). GO terms.

Table S13 (Microsoft Excel format). Information on yeast strains.

## Materials and Methods

### General comments

All chemicals and reagents, unless noted otherwise, were purchased at the highest available purity from Sigma-Aldrich, Taufkirchen, Germany.

### Generation of haploid yeast kinase deletion strains

The bait strains BY7092 and BY7220 were kindly provided by Charlie Boone, Toronto. Heterozygous diploid yeast strains harboring the kinase deletions were obtained from Euroscarf (<http://www.uni-frankfurt.de/fb15/mikro/euroscarf/index.html>) and grown in a 384-array format. After sporulation, the resulting spores of these strains were mated against a haploid bait strain BY7092 (Mat alpha, *can1::STE2pr-Sp\_his5 lyp1Δ his3Δ leu2Δ ura3Δ met15Δ*) containing the plasmid pRS316 (strains labeled “derived from BY7092”, table S13), or against the strain BY7220 (Mat alpha, *can1::STE2pr-Sp\_his5 lyp1Δ cyh2Δ his3Δ leu2Δ ura3::NatR met15Δ*) (strains labeled “derived from BY7220”, table S13). Haploid cells were selected according to the procedure described by Tong and Boone (1) with the following modifications for strains derived from BY7092: Diploid selection was performed on MSG-U +G418 for 3 days at 30°C followed by growing on YPD + G418 for 1 day at 30°C. Sporulation was performed in the absence of Ura, and the final meiotic progeny selection was performed in the absence of clonNat. Strains derived from BY4743 (table S13) were obtained after dissecting sporulated heterozygous diploid deletions strains. The genotype of these strains is as follows: S288C (Mat a, *his3Δ1 leu2Δ0 met15Δ0 ura3Δ0*), unless otherwise noted. The correct location of the kanamycin-resistance cassette was verified by PCR in all strains with Phusion Polymerase (Finnzymes), which was used according to the manufacturer’s specifications, and primers as found under the *Saccharomyces* Genome Deletion Project Web page ([http://www-sequence.stanford.edu/group/yeast\\_deletion\\_project/deletions3.html](http://www-sequence.stanford.edu/group/yeast_deletion_project/deletions3.html)), which are detailed in the “Primer Sequences” section: ([http://www-sequence.stanford.edu/group/yeast\\_deletion\\_project/Deletion\\_primers\\_PCR\\_sizes.txt](http://www-sequence.stanford.edu/group/yeast_deletion_project/Deletion_primers_PCR_sizes.txt)).

### Generation of analog-sensitive kinase strains

Genes were amplified by PCR and cloned into the vector pRS416. Gate-keeper residues in the ATP-binding pocket of a given kinase were mutated to glycine or alanine (the position of the amino acids is indicated below) by fusion PCR and constructs were verified by sequencing. Diploid strains carrying a deletion of the respective gene were transformed with the appropriate plasmid and were then sporulated. The resulting haploid strains were tested for sensitivity to 5-FOA and to various ATP analogs (2).

The genotypes of the strains used for phosphoproteomics are as follows:

*bur1::KanMX, LYS2, met15 + pJU 1164 (BUR1)*

*bur1::KanMX, LYS2, met15 + pJU 1179 (BUR1 - L149G)*

*cdc15::KanMX, lys2, MET15 + pJU 1167 (CDC15)*

*cdc15::KanMX, lys2, MET15 + pJU 1175 (CDC15 - L99G)*

*cdc28::KanMX, LYS2, met15 + pJU 1189 (CDC28)*

*cdc28::KanMX, LYS2, met15 + pJU 1203 (CDC28 - F88G)*

*hrr25::KanMX, LYS2, met15 + pJU 1163 (HRR25)*

*hrr25::KanMX, LYS2, met15 + pJU 1197 (HRR25 - I82G)*

*mps1::KanMX, LYS2, met15 + pJU 1166 (MPS1)*

*mps1::KanMX, LYS2, met15* + pJU 1181 (*MPS1 - M516G*)

*rio1::KanMX, LYS2, met15* + pJU 1168 (*RIO1*)

*rio1::KanMX, LYS2, met15* + pJU 1173 (*RIO1 - M195G*)

*cbk1::KanMX, LYS2, MET15* + pJU 1194 (*CBK1 - M429A*)

*kin28::KanMX, LYS2, met15* + pJU 1161 (*KIN28*)

*kin28::KanMX, LYS2, MET15* + pJU 1172 (*KIN28 - L83A*)

### **Determination of inhibitor sensitivity**

To determine both the optimum inhibitor and the concentration at which it should be added to the yeast culture, we used spot assays. The following combinations (see plates below) were found to inhibit growth of the mutant strains at a final inhibitor concentration of 3  $\mu$ M.

| <i>Kinase</i> | <i>Inhibitor (see below for detailed description)</i> |
|---------------|-------------------------------------------------------|
| Bur1          | 3-MB-PP1 (3)                                          |
| Cdc15         | Bn-PP1 (4)                                            |
| Cdc28         | 3-MB-PP1 (3)                                          |
| Hrr25         | 3-MB-PP1 (3)                                          |
| Mps1          | 3-MB-PP1 (3)                                          |
| Rio1          | Bn-PP1 (4)                                            |
| Cbk1          | 2-MB-PP1 (5)                                          |
| Kin28         | 1-NA-PP1 (6)                                          |

### **Growth of yeast strains: deletion mutants**

The yeast strains were streaked out on an appropriate plate and three biological replicates (from three single colonies) for each of the *S. cerevisiae* wild-type and deletion strains were grown to an OD of  $\sim$ 0.8 at 30°C in synthetic defined (SD) medium [per liter: 1.7 g yeast nitrogen base without amino acids (Chemie Brunschwig), 5 g ammonium sulfate, 2% glucose (w/v), 0.03 g isoleucine, 0.15 g valine, 0.04 g adenine, 0.02 g arginine, 0.02 g histidine, 0.1 g leucine, 0.03 g lysine, 0.02 g methionine, 0.05 g phenylalanine, 0.2 g threonine, 0.04 g tryptophan, 0.03 g tyrosine, 0.02 g uracil, 0.1 g glutamic acid and 0.1 g aspartic acid). Because we wanted to make sure that the yeast cultures at the chosen harvesting conditions were still in the log phase as well as having an excess of glucose, we determined the growth curve of the wild-type strain in the medium used and determined the glucose concentration at distinct time points. We found that when grown to an OD of  $\sim$ 0.8, there was still an excess of glucose in the medium.

### **Growth of yeast strains: inhibitor sensitive mutants**

Growth and harvesting were performed as described for the deletion mutants with the following differences. Because of the limited availability of the inhibitors, only single cultures were grown of each strain carrying the plasmid with the kinase gene or the strain carrying the plasmid with the inhibitor sensitive kinase gene [of each resulting phosphopeptide isolate, three technical replicates were measured by LC-MS(/MS)]. Then, inhibitor was added at a final concentration of 3  $\mu$ M to the liquid cultures for 23 min.

### **Harvesting of yeast cells**

Trichloroacetic acid (at a final concentration 6%) was added directly to the yeast cultures, which were then placed for 10 min into ice water. The yeast cells were pelleted by centrifugation at 1,500g, the supernatant was discarded, and the cells were resuspended in ice-cold acetone. After another round of centrifugation at 1,500g, the pellet was washed once more with ice-cold acetone, the supernatant was removed, and the pellet was frozen at -80°C until required for further processing.

### **Processing of the yeast pellets**

The yeast cells were subsequently lysed by beating with glass beads in 8 M urea, 50 mM ammonium bicarbonate, and 5 mM EDTA. Debris was removed by centrifugation at 16,000g. Protein concentration was determined with a BCA protein assay kit (Pierce). Then, for each replicate, 3.5 mg of total protein were reduced, alkylated, digested, and prepared for phosphopeptide isolation as described previously (7). For 16 mutants and the wild-type strain, several microgram of the peptide mixture were saved to quantify changes in protein abundance.

### **Phosphopeptide isolation**

The phosphopeptides were isolated with titanium dioxide (TiO<sub>2</sub>, GL Science) from the proteome digest as previously described (7) with slight modifications. 3.5 mg of peptides were reconstituted in 280 µl of a solution containing 80% acetonitrile (ACN) and 3.5% trifluoroacetic acid (TFA), which was saturated with phthalic acid. The peptide solution was added to 1.2 mg of equilibrated TiO<sub>2</sub> in a blocked Mobicol spin column (MoBiTec) and was incubated for 30 min with end-over-end rotation. The resin was thoroughly washed twice with 280 µl of the above described saturated phthalic acid solution, twice with 280 µl of a solution of 80% ACN and 0.1% TFA, and twice with 280 µl of 0.1% TFA. Phosphopeptides were eluted twice with 150 µl of 0.3 M NH<sub>4</sub>OH. After elution, the pH was rapidly adjusted to 2.7 with 10% TFA, and phosphopeptides were purified with an appropriate C18 cartridge.

### **Mass spectrometric analyses of yeast phosphopeptide isolates**

All phosphopeptide (and peptide) samples were analyzed on a hybrid LTQ-Orbitrap mass spectrometer (ThermoFischer Scientific) interfaced with a nano-electrospray ion source. Chromatographic separation of peptides was performed on an Eksigent nano-LC system (Eksigent Technologies), equipped with an 11-cm, fused silica emitter, which had an inner diameter of 75 µm inner diameter (BGB Analytik), packed in-house with a Magic C18 AQ, 5- or 3-µm beads, loaded from a cooled (4°C) Spark Holland autosampler, and were separated with an ACN/water solvent system containing 0.1% formic acid, with a flow rate of 200 nl/min. Phosphopeptide mixtures were separated with a gradient from 4 to 24% ACN over 60 min. For MS/MS data acquisition, one to three data-dependent MS/MS scans were acquired in the linear ion trap for each Orbitrap-MS scan, the latter acquired at 60,000 full width at half maximum (FWHM) nominal resolution settings, with an overall cycle time of ~1.2 s. To maximize the number of peptide identifications, a different charge state screening was employed for each of the biological replicates (no technical replicates were measured, except for the analog-sensitive strains). Either only 2+ ions were selected, rejecting 1+, 3+, and higher charged ions and those with undetermined charge or only 3+ and higher charged peptides were selected, excluding 1+, 2+, and undetermined charges. In addition, for some runs, multistage activation was employed with 98 D, 49 D, 32.66 D, and 24.5 D defined as the neutral loss masses. For injection control, the automatic gain control (AGC) was set to 5 x 10<sup>5</sup> and 1 x 10<sup>4</sup> for full Orbitrap-MS and linear ion trap MS/MS, respectively. The instrument was

calibrated externally, according to the manufacturer's instructions. Data were acquired with an internal lock mass calibration at  $m/z$  429.088735 and 445.120025.

### Database searches

The MS2 data were searched against a decoy/non-decoy version of the *Saccharomyces* Genome Database SGD non-redundant database containing 13,590 protein entries (6,795 forward protein entries and 6,795 reversed protein entries) with SORCERER-SEQUENT v3.0.3 software which was run on the SageN Sorcerer2 (Thermo Electron). For the in silico digest, trypsin was defined as the protease, cleaving after lysine (K) and arginine (R); if followed by proline (P), the cleavage was not allowed. Two missed cleavages and one non-tryptic terminus were allowed for the peptides which had a maximum mass of 6,000 D. The precursor ion tolerance was set to 7 ppm and fragment ion tolerance was set to 0.5 D. The data were searched under the conditions that phosphorylation (+79.9663 D) of serine, threonine, and tyrosine was defined as a variable modification and carboxyamidomethylation of cysteine (+57.0214 D) was defined as a fixed modification. For the non-phosphopeptide samples, no variable modification was defined. Finally, the search results obtained by Sequest were subjected to statistical filtering by PeptideProphet (V3.0) (8). A PeptideProphet cut-off of 0.9 was chosen, which had to be met before a peptide was considered as correctly identified. Because not all of the identified tandem mass spectra could be mapped back to their corresponding MS1 peptide ions, we furthermore determined the false discovery rate (FDR) of the annotated peptide ions, separately for each phosphorylation pattern. For that purpose, we kept the PeptideProphet probability cut-off of 0.9, and used the target-decoy entries present to determine the FDR (9). The resulting false positive rates are shown in table S7, and were on average 3.8%. In addition, only phosphopeptide isolates that showed a strong enrichment in phosphopeptides were considered for further processing (table S7). The specificity of the phosphopeptide enrichment was computed for each given comparison between wild-type and mutant phosphorylation patterns and all (phospho)peptides with a PeptideProphet score  $>0.9$  as  $(\#phosphopeptides)/((\#all\ peptides)*100)$ . Note that because in our computational pipeline the identification of phosphopeptides was penalized compared to that of non-phosphopeptides, it is correct to assume that the specificity of isolation was even greater than the determined average of 80%.

### Localization of phosphorylation sites

Beausoleil *et al.* described an algorithm that computes the probability of whether the localization of a phosphorylated amino acid residue within a peptide is correct, which is called the AScore (<http://ascore.med.harvard.edu/>) (10). For this work, we adopted a custom version of this algorithm to be executable on PeptideProphet (V3.0) (8) output files after the Sequest database search. A detailed description of our AScore version was previously described (11). The maximum and average AScore values for the phosphopeptides of this study are shown in table S3.

### Data availability

All data, including the mass spectra, can be viewed in the PhosphoPep (<http://www.phosphopep.org>) database (12, 13).

## Quantification of phosphopeptide ions

For the detection of the regulated features (ion peak detection, computation of the peptide ion area from the LC-MS data, alignment of the features over multiple LC-MS runs, and annotation of each features with the phosphopeptide sequence), we used the SuperHirn algorithm (v2.0), as described by Mueller *et al.* (14). The most important parameters used in SuperHirn were as follows:

```
// GENERAL:
//
// retention time tolerance: tolerance with which lc-peaks will be merged
// AFTER the alignment of the spectra [min]
MS1 retention time tolerance=2.5
//
// mass time tolerance: mass tolerance with which lc-peaks will be merged
// AFTER the alignment of the spectra [Da]
MS1 m/z tolerance=0.01
//
// MS2 m/z tolerance: mass tolerance with which MS2 identifications will be
// associated
// to a defined MS1 LC elution peak [Da]
MS2 m/z tolerance=0.008
//
// MS2 mass matching modus: define which modus used to match ms2
// assignments to ms1 peaks
// - theoretical mass [1] : use theoretical mass calculated from sequence
// - MS1 precursor mass [0]: use measured ms1 mass of precursor ion
MS2 mass matching modus=1
//
//
// Peptide Prophet Threshold: threshold used in clustering peptides into proteins
//
Peptide Prophet Threshold=0.5
//
// MS2 SCAN tolerance: SCAN tolerance with which MS2 identifications
// will be associated
// to a defined MS1 LC elution peak []
MS2 SCAN tolerance=150
//
// MS2 retention time tolerance: retention time tolerance with which MS2
// identifications will be associated
// to a defined MS1 LC elution peak [min]
// (if set to -1, then the MS1 retention time tolerance will be
// used
MS2 retention time tolerance=5
//
// IL MS2 SCAN tolerance: SCAN tolerance with which MS2 info FROM
// INCLUSION LIST will be associated
// to a defined MS1 LC elution peak []
INCLUSIONS LIST MS2 SCAN tolerance=200
//
//
```

```

//      PPM MS2 MZ modus:   defines if PPM values should be used in the assignment of
MS2 info to MS1 features
//          if set to 1, then matched via PPM value, otherwise via mz tolerance
//          (adjust then also the parameter<MS2 PPM m/z tolerance> according to your
experiment!) 1=on, 0=off
//
PPM MS2 matching modus=1
//
//      MS2 PPM m/z tolerance:           mass tolerance with which MS2 identifications
will be associated
//          to MS1 features. same as parameter <MS2 m/z tolerance> but in PPM
//          to activate, set parameter <PPM MS2 matching modus> to 1!
MS2 PPM m/z tolerance=5
//-----
//
//      MS1 feature selection options
// these options apply to the selection of MS1 feature from the XML/APML format
// they do not apply to the basic extraction of features from the raw mzXML data
//
//      elution window:                 enables to only process a period of the
//                                     elution gradient, defines by start / end
//                                     only peaks within this region are accepted!!!, [min]
start elution window=15.0
end elution window=110.0
//
//      LC peak score cutoff:           above which are LC peaks accepted,otherwise discarded
LC peak score cutoff=10000
//
//      LC peak intensity cutoff:       only MS1 feature at or over this intensity level are
accepted, otherwise discarded
MS1 feature intensity cutoff=10000
//
// Charge state min: For the selection of MS1 features by charge state, here its, the minimal
charge state:
MS1 feature CHRG range min=2
//
// Charge state max: For the selection of MS1 features by charge state, here its, the maximal
charge state:
MS1 feature CHRG range max=5
//
// M/z min: For the selection of MS1 features by m/z, here its, the minimal m/z value:
MS1 feature mz range min=300
//
// M/z max: For the selection of MS1 features by m/z, here its, the maximal m/z value:
MS1 feature mz range max=1600

//
//      STORAGE OF DATA IN THE XML MASTER AND LC-MS FILE:
// ( 0 = no, 1 = yes )
//

```



```

//      store only best MS2 per feature      :      only the best MS2 scan / feature will be
store in the XML file
//
//                                          (LC-MS runs and MasterMap) use to reduce
XML file size
store only best MS2 per feature=0
//
//      store only best MS2 per ALIGNED feature :      only the best MS2 scan /
ALIGNED feature will be store in the XML file
//
//                                          (LC-MS runs and MasterMap) use to
reduce XML file size
store only best MS2 per ALIGNED feature=0
//
//      nb. max. alternative protein names : max. number of alternative proteins that will be
store in the XML file
//
//                                          for a non proteotypic peptide
nb. max. alternative protein names=5
//-----
//
//      ALIGNMENT OF LC_MS SPECTRA:
//
//      Window retention time:      retention time window (min) to search
//                                  for common peaks BEFORE the alignment.[min]
retention time window=5.5
//
//      mass window :      mass window (DA) to search for common
//                          peaks BEFORE the alignment. [Da]
mass / charge window=0.008
//
//      smoothing error TR window:      used to copmute the alignment error, use a tr
window to
//
//                                  calculate the standard deviations of raw data to predicted
//                                  delta shift [min]
smoothing error TR window=1.0
//
//      max. nb. stripes:      in the plot of TR A vs TR B, there are off diagonal
//
//                                  horizontal and vertical stripes, which come from
//                                  high abundance long eluting peptides.
//
//                                  allow only such stripes of max. length around the
diagonal [#]
max. nb. stripes=1
//
//      sequence alignment comparsion:      defines the weight with which peptide
identification information
//      is used in the matching of common lc/ms peaks between runs ( 0(not used) - 5000)
MS2 info alignment weight=0
//
//      maximal smoothing error:      when calculating the upper / lower error of the
fitted delta
//
//                                  do not allow an error that is bigger then this paramater
[ min]
maximal smoothing error=3.0

```

```

//
//      % outside error delta points: how many percentage of points can still lay outside the
alignment error
//
//                      borders in order to stop the alignment iterations
//
perc. outside error delta points=0.75
//-----
//
// LC-MS correlations
//
//      intensity bin size:          used to correlate 2 LC-MS peaks also by their intensity
//
//                      compares in which bin the 2 peaks are, for this use a bin
size
intensity bin size=2000
//
//      intensity bin tolerance:      in the comparison of intensity bins, how far to bins can
//
//                      be appart
//
//                      and still be accepted for same
intensity bin tolerance=2
//
//      min. LC/MS correlation score:  represents the worst score possible, this one will
//
//                      be used to
//
//                      normaize the observed scores between 0(bad) and
1(good) [ 0 ... 1]
minimal LC/MS score=0.1
//
//      LC/MS sim. score modus:      which scoring system to use for LC/MS similarity:
//
//      - [ALIGN]: assessment of uncertainty in the alignment
//
//      - [INTNES]: assessment of ranking correlation of peak areas
//
//      _ [PEAK_MATCHING]: according to how many features overlap
//
//      _ [TOTAL]: combination of all scores:
//
//      _ [NORM_TOTAL]: normalized score of total score:
LC/MS sim. score modus=TOTAL
//-----
//
// MS1 PEAK DETECTION PARAMETERS FOR THE DIFFERENT FILTER METHODS:
//
// Create monoisotopic LC profile: to create and store the original profile of the detected
//
//                      monosiotopic pecursors in the XML (!!! increases the
//
//                      XML file size!!! (on[1]/off[0])
Create monoisotopic LC profile=1
//
//
//      FT MS1 data centroid data :      define if ipnut FT-LTQ data is in centriod mode
(1)
//
//                      or ectract data from profile mzXMLs (0)
FT MS1 data centroid data=0
//
//      mz cluster tolerance :          defines which tolerance is used to cluster different
//
//                      m/z values into a m/z cluster
FT peak detect MS1 m/z tolerance=0.01

```

```

//
//
// MS1 minimal # peak members: minimal number of members in an LC elution
peak, if
// an elution peaks is discarded if it has less member
FT peak detect MS1 min nb peak members=4
//
// MS1 minimal intensity : all peaks with small intensity are not considered
FT peak detect MS1 intensity min threshold=20000
//
// MS1 intensity cut off : used to discard peak with too low intensity in a
// LC elution cluster. peak which are less x% of the
// cluster apex peak intensity are removed [ 1 .. 0]
MS1 intensity apex percentil cutoff=0.1
//
// MS1 max scan member distance: defines how many scans can be between members
of
// a LC elution peak (MS2 scans are not included!!!)
MS1 max inter scan distance=5
//
// Tr resolution: used for to compute the peak area of an LC peak
// in the integration process
MS1 LC retention time resolution=0.01
//
// Peak detection absolute mass precision in Dalton (between isotopes) 0.01
Absolute isotope mass precision=0.05
//
// Peak detection relative mass precision in ppm (between isotopes) 10
Relative isotope mass precision=10
//
// Centroid is calculated in window of this size around local maxima
Centroid window width=5
//
// Coefficient of variance for intensities (also includes deviation from
IntensityCV=0.9
//
// Factor (f) to define which isotopic peaks are detectable relative to highest isotopic
peak I_max: I_iso > I_max*f
Detectable isotope factor=0.2
//
// Minimal peak height (peaks smaller than this values are not considered as
monoisotopic peaks)
Minimal peak height=0.0
//
// Intensity values below this value are considered as zero (before peak detection)
Intensity ground level=1.0
//
// Report all found monoisotopic peak to file mono_peaks.txt
Report mono peaks=0
//
// Directory where debug files are written

```

```
Debug directory=  
//  
// if "Report mono peaks"==1 the info about the peak detection at this scan number will be  
// written to debug files  
Report scan number=0  
//-----  
//  
// STATISTICS TOOLBOX:  
//  
// NORMALIZATION OF INTENSITY ACROSS LC_MS RUNS IN MASTER RUN:  
//  
// intensity coeff. window : windows size to slide over LC elution time scale  
// and  
// compute an intensity normalization coefficient [min.]  
intensity coeff. window=3  
//  
// Retention time step: value of the retention time step to calculate the  
// intensity normalization coefficient [min.]  
retention time step=1.0  
//  
// feature align percentage: normalization between n LC-MS runs is performed on features  
// aligned  
// across all n runs. to allows flexibility, this parameters allows to  
// specify  
// across what percentage of runs the feature has to be aligned [ 0  
// ... 1.0]  
normalization feature align percentage=1.0
```

## **Post-processing of SuperHirn results to avoid signals caused by missed feature alignment**

Occasionally, SuperHirn fails to correctly align some of the phosphopeptide features from multiple LC-MS/MS runs. If such an alignment failure occurs when comparing mutant and wild-type samples, then it can lead to erroneous inference of a “reliable” change in phosphopeptide abundance in response to a mutation (for example, in cases where the peptide feature happens to be aligned in all three wild-type samples, but not in the mutant samples). To avoid such false signals, we identified potential mis-aligned features in a post-processing step and, in each case, merged them to a single representative feature. Essentially, we identified mis-aligned features based on similarities in mass and retention time (allowing for a certain “window” of tolerance). In a first step, we only considered features that had MS2 information and a PeptideProphet score of  $>0.9$ . We created clusters of potentially mis-aligned features by grouping those with the same peptide sequence, mass, and retention time. For both mass and retention time, we permitted tolerances of 15 ppm for mass and 7 min for retention time; the latter tolerance was increased to 15 min at the beginning and end of each LC separation run. MS2 sequences had to be identical, except with respect to the exact position of the phosphorylated residue (allowing a shift of a maximum of 5 residues). In a second step, we extended the clusters by including non-MS2-features. For these, more stringent tolerance intervals were used: 3 ppm mass tolerance, and a 3- or 5-min retention time tolerance. Finally, the features of every cluster were merged to a single representative feature. The intensity values were added run-wise, the average mass of all features was used as the new aligned feature mass, and for retention time and charge, the full range was provided. The MS2 data of an aligned feature were represented by a non-redundant list of all of the encountered sequences. For features that were apparently partitioned exactly along the wild-type–mutant distinction (that is, observed in the wild-type, but never observed in the mutant), we intentionally increased the window of tolerance to make sure that these observations were real (that is, we erred to be on the safe side here, even if this occasionally meant the loss of a real signal). For these features, tolerances were 25 ppm mass tolerance and 15 or 20 min retention time in the first step, and 3 ppm mass tolerance and a 5- or 7-min retention time in the second step. All tolerance-values stated above were chosen based on manual inspection of the data, with the simple rule that distinct features with matching MS2 identification should be merged, but that features with incompatible MS2 identifications should not be merged. In the entire post-processing pipeline, only features with a signal-to-noise-ratio better than 10 were considered (for features that seemed to appear or disappear in the comparison between wild-type and mutant, the signal-to-noise-ratio threshold was increased to 60), assuming as background noise level in a given run the average of the 50 lowest signals as detected by SuperHirn. With respect to the MS2 sequences, half-tryptic peptides were discarded and all other peptides were merged with the corresponding peptide. Finally, we performed two manual validation steps before continuing with the data analyses. First, for very few cases, peptides indicating the gene product of a knock-out were observed. If an explanation for this observation could be found (low peptide probability or wrong peptide identification, sample carry over, mis-assignment, etc.) the entries were removed. If not, the master maps were omitted from further analyses. Second, we plotted the extracted ion chromatograms for all phosphopeptide ions that were only detected either in the wild-type or mutant replicates to manually validate their presence or absence (“vanished”/“appeared”).

## **Statistical significance of observed differential abundances of phosphopeptides**

After post-processing of the SuperHirn output files, the phosphopeptides were separated into different statistical classes for further analysis. A class consisted either of phosphopeptides for which the MS1 signal was detected in all replicates (three times for the wild-type and three times for the mutant) or of phosphopeptides for which 1, 2, 3, or up to 5 signals were missing.

The category “3 signals missing” was further separated into phosphopeptides for which either (i) the signal was reproducibly present in either all wild-type or all mutant samples, or (ii) the signal was spread over all wild-type and mutant samples. Before statistical analysis, the missing data values were imputed with the integrated background noise as determined by the SuperHirn algorithm. These datasets were then further analyzed as described in detail previously (15, 16). In short, the employed software tool called Corra (17) wraps around the Limma (16) software package, which is available from the R-based project Bioconductor, and performs a statistical test comparing the abundances of a feature between the mutant and the wild type replicate samples. The test is an Empirical Bayes alternative to the Welsh  $t$  test, and is based on a moderated  $t$  statistic where the standard error is calculated with the information from all of the analyzed phosphopeptide features. Overall, the statistical analysis that we used assumes that the abundances of each feature follow a normal distribution across runs. (Normality analysis of our dataset showed that deviations to normality, even if present, were minor; the same was true for the assumption of equal distribution of our features.) Even if this assumption was not always fulfilled, the test statistics and their associated  $P$  values remain useful to detect changes in abundance. The test is conducted separately for each feature and each mutant.

When the number of replicate samples in the experiment is small, inference based on the  $t$  test may be somewhat unstable. The Empirical Bayes (or moderated) alternative to the  $t$  test, originally developed for gene expression microarrays (16, 18), is designed to remedy this problem. It combines the information regarding feature variability across all features, and improves both the sensitivity and specificity of finding the true changes in abundance across sample types. The resulting  $P$  value is then adjusted for multiple comparisons according to the procedure by Benjamini and Hochberg, which controls the FDR (19). A potential technical problem with the application of the procedure is the positive correlation in abundances of multiple peptides from the same differentially abundant protein, as well as an increased positive correlation between test statistics due to the use of the Empirical Bayes procedure. However, Benjamini *et al.* (20) demonstrated that calculations of the FDR are robust to positive inter-feature correlation. Therefore, the application of the procedure to our dataset was appropriate. As has been described for microarray data (21), a major factor for the reproducibility of a given regulation is the observed fold-change. Therefore, besides using the FDR cut-off of 0.015, we also required the fold-change in the abundance of a phosphopeptide to be equal or greater than a  $\log_2$  of 1.5 to consider it as regulated. For features that were only seen in either the wild-type or the mutant (“vanishers” or “appearers”), this cut-off was raised to  $\log_2 >4$  to exclude the possibility that phosphopeptide ions just above (or below) the MS detection limit were detected to vanish (appear).

### **Changes in the extent of phosphorylation versus changes in protein abundance**

For the first analysis (comparison of the changes in the abundance of phosphopeptides with those of non-phosphorylated peptides) the following deletion mutants were analyzed:

YCR079W  
YGL059W  
YGR040W  
YHR135C  
YKL171W  
YOR231W  
YBL088C

YDL079C  
YDL101C  
YGL180W  
YGR092W  
YJL128C  
YLR248W  
YNL307C  
YPL140C  
YPL141C

For the second analysis, all regulatory events were considered independently, provided that (i) at least one phosphopeptide was significantly regulated, and (ii) a second phosphopeptide mapped to the same phosphoprotein, irrespective of whether or not it was also observed as significantly regulated. Note that responses with opposite directionality are actually not expected to occur very frequently: They require both the disappearance and the appearance of specific phosphopeptides in response to deletion of the same kinase or phosphatase.

### **Global impact of kinases and phosphatases on the phosphoproteome**

When computing the impact of a given kinase or phosphatase, we first normalized the number of regulated phosphopeptides to all of the identified phosphopeptides of that given kinase or phosphatase and to the total number of regulated phosphopeptides (see Fig. 2). The enzymes were then ranked according to their normalized impact. Note that the determined numbers were just an estimate, because of (i) experimental variations between analyzed batches and therefore differences in LC-MS maps; (ii) the incomplete covered phosphoproteome; and (iii) our computational approach of performing pair-wise comparisons between wild-type and mutant samples. We considered kinases or phosphatases as shown in Fig. 3A to be active if 10 or more phosphopeptides changed significantly in abundance upon deletion of the kinase or phosphatase or upon inhibition of the essential kinase.

### **Computation of the biological processes enriched in the inactive and active kinases and phosphatases**

For this analysis, we only considered the gene deletion strains, because the inhibitable strains are not representative as a result of the variability in the impact on the phosphoproteome depending on the length of time of inhibition, for example. The enrichment analyses were performed with <http://pipe.systemsbio.org> using the default settings (yeast proteome background).

Because the following terms are associated with the kinases and phosphatases themselves, we removed them from the results shown:

- phosphate metabolic process
- phosphorus metabolic process
- protein amino acid phosphorylation
- phosphorylation
- post-translational protein modification
- protein modification process
- biopolymer modification
- cellular protein metabolic process

protein metabolic process  
cellular macromolecule metabolic process  
signal transduction  
cell communication  
biological regulation  
dephosphorylation  
biopolymer metabolic process  
protein amino acid dephosphorylation  
regulation of biological process  
regulation of cellular process  
macromolecule metabolic process  
regulation of biological process  
regulation of cellular process  
response to stimulus

### **Computation of the biological processes enriched among all responding proteins for a given kinase or phosphatase**

For each kinase or phosphatase, the regulated phosphopeptides were mapped to their corresponding proteins. In case phosphopeptides mapped to several proteins, only those peptides mapping to homologous proteins (with equal biological processes) were retained. The enrichment of GO biological process terms was calculated with the hypergeometric test-based *GOstats* package version 2.8.0 and the yeast annotation package *org.Sc.sgd.db* version 2.2.6 from Bioconductor. Only GO terms with a *P* value <0.01 were considered. All values in table S11 are given in  $\log_2$ .

### **Determination of morphological phenotypes**

The morphological phenotypes of all strains (table S4) were determined as described by Gordon *et al.* (22). Furthermore, phenotype data as measured by Ohya *et al.*(23) and growth speed as determined by Hillenmeyer *et al.* (24) were used for the analyses. A strain was considered to have a strong growth phenotype (“+”) or very strong growth phenotype (“++”) if it grew between to between 30 to 100%, >100% as fast/slow as the wild-type strain under the same growth conditions. A strain was considered to have a strong morphological phenotype (“+”) or a very strong morphological phenotype (“++”) if at least one or more than 10, respectively, of the 254 parameters had a significance equal to or smaller than  $1 \times 10^{-05}$ .



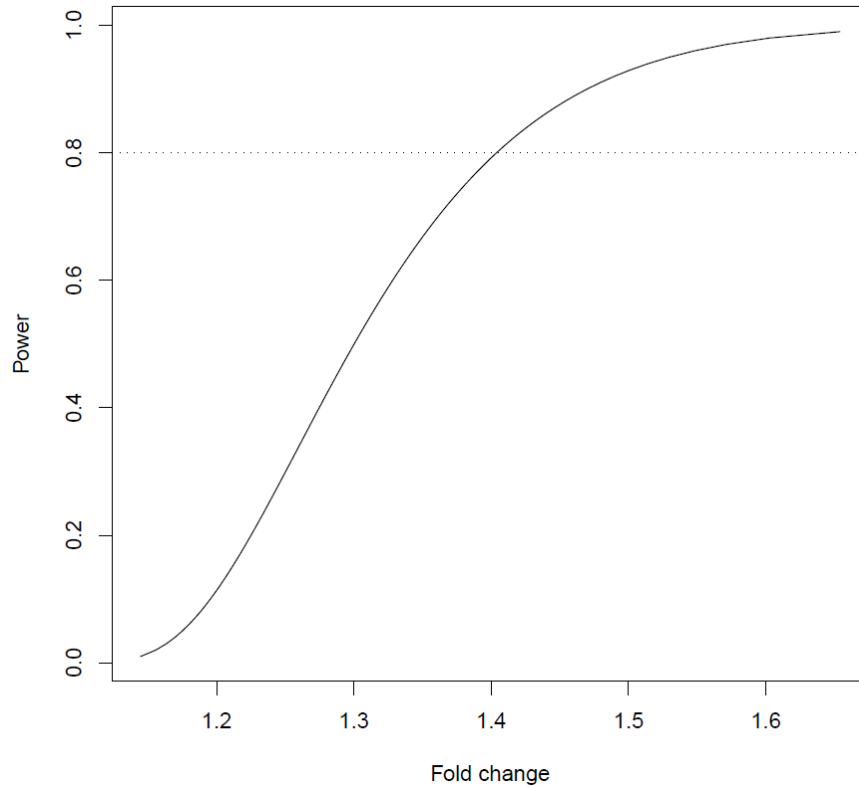

**Fig. S1:** Power of the analysis approach. The results of the Empirical Bayes approach were used to provide estimates of the power of our analysis, as described (25). Specifically, we took the median of posterior estimates of feature-specific variances provided by the Empirical Bayes  $t$  test, and the proportion of statistically significant changes in the datasets as input parameters. We set the FDR threshold to 0.1 and varied the expected fold-change between 1.0 and 1.7. The figure displays the power of the statistical test in this setting.

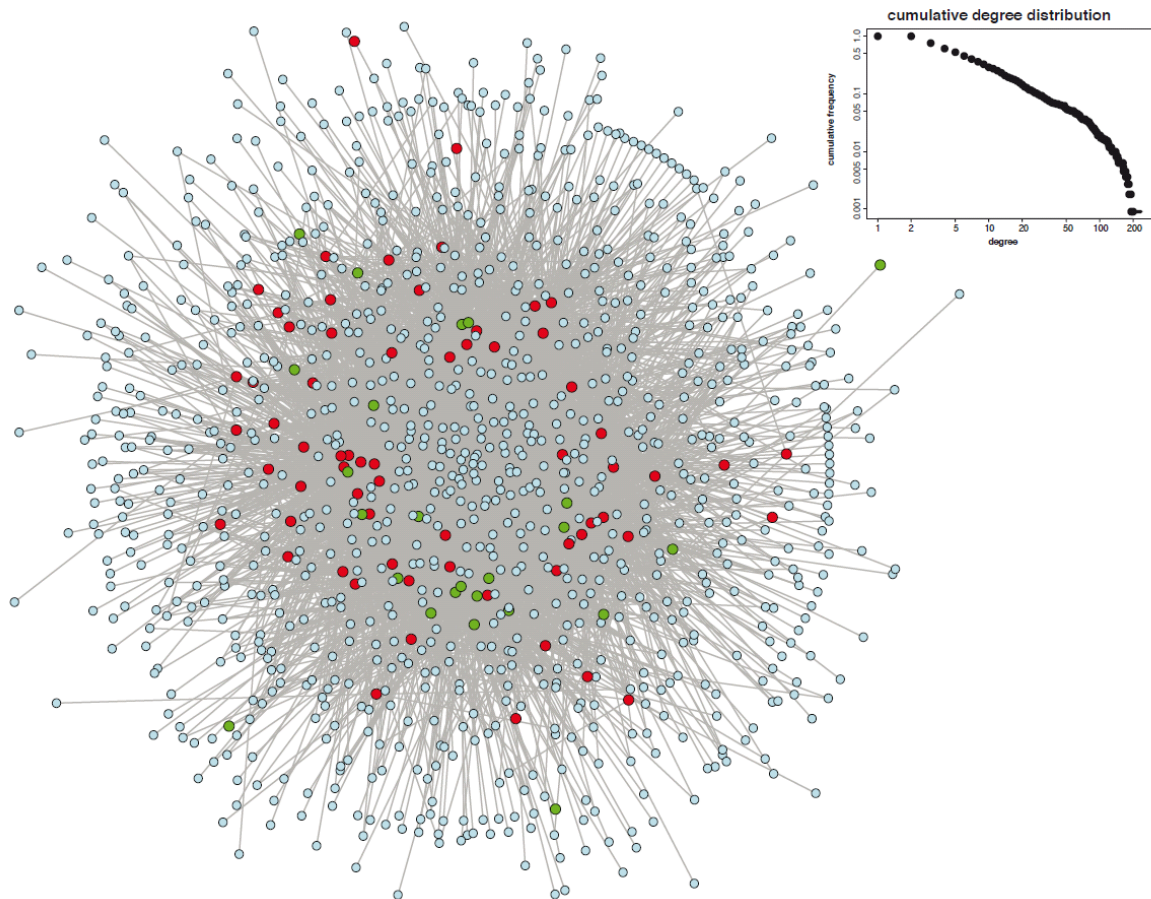

**Fig. S2.** Topological properties of the protein phosphorylation network. The network shown, which contains 1,088 nodes and 6,509 unique edges, is a summary view of the connectivity observed in our dataset. Kinases are shown in red, phosphatases in green, and responder proteins in light blue. Lines indicate substantial regulatory events. Inset: degree distribution of network connectivity. The x-axis shows the degree of connectivity of the network and the y-axis shows the cumulative frequency of the appearance of a given degree. The degree of a node is the number of edges connected to that node. The cumulative degree distribution was indicative of a scale-free topology. The average path length of the network is 3.1.

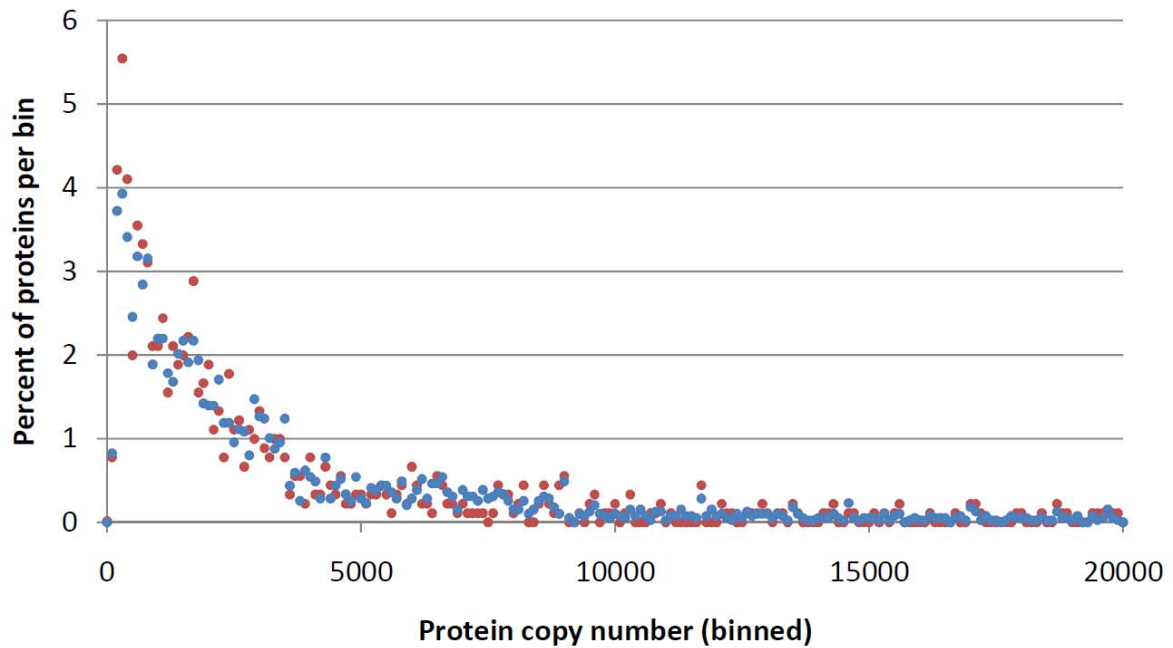

**Fig. S3.** Abundance distribution of responder phosphoproteins (proteins that contain “regulated” phosphopeptides). A comparison of the yeast proteome abundance distribution (blue) and the abundance of the regulated phosphoproteins as observed in this study (red, significance threshold  $FDR \leq 0.015$  and requiring at least a  $\log_2$  1.5-fold regulation or a full on or off response). The protein abundances were taken from Ghaemmaghmi *et al.* (26). Proteins with more than 20,000 copies per cell are not displayed (the distribution of proteins with more than 20,000 copies per cell is similar between the analyzed phosphoprotein sets and the yeast proteome). The x-axis displays the protein copy number per cell, the y-axis the percentage of protein counts per copies per cell bin (with a bin size of 100) normalized by all of the proteins from the regulated phosphoprotein set or the data set of Ghaemmaghmi *et al.* (26). The observations made for the responder phosphoproteins also held true if only the non-regulated phosphopeptides were analyzed, if the protein abundances were estimated by spectral counting as determined by Weiss *et al.* (27), or both.

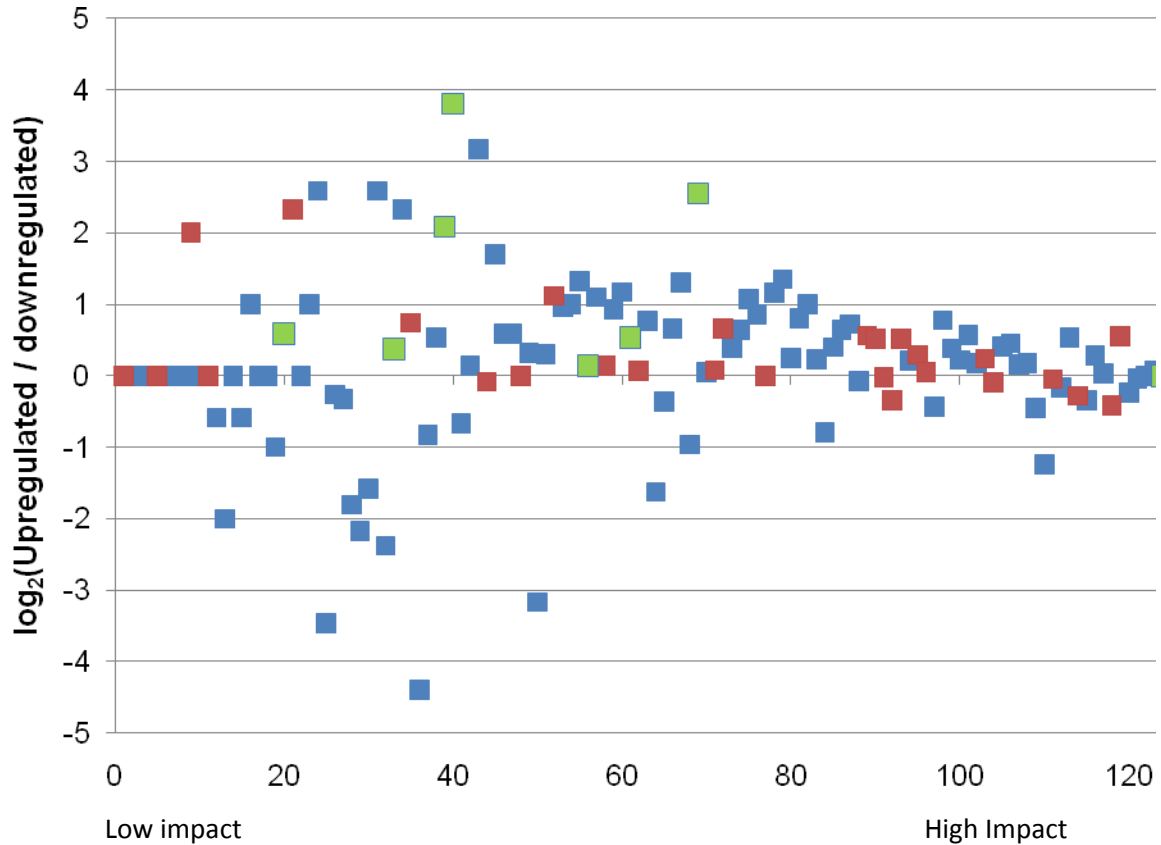

**Fig. S4.** Ratio of phosphopeptides that are reduced or increased in abundance. The y-axis shows the ratio [ $\log_2(\text{number of increased phosphopeptides} / \text{number of decreased phosphopeptides})$ ] and on the x-axis, the kinases and phosphatases are ordered according to the extent of their effect on the phosphoproteome (0 = lowest effect; 124 = highest effect, as calculated from the dataset in this study). The blue squares show the ratios for the kinases, the red squares show the ratios for the phosphatases, and the green squares show the ratios for the essential kinases. The higher ratios observed for the kinases and phosphatases with low activities were probably noise, because of the fewer regulated phosphopeptides observed. For this plot, relative regulation (“fold-changers”) and complete disappearance (“on/off-responders”, “vanishers”) were not distinguished.

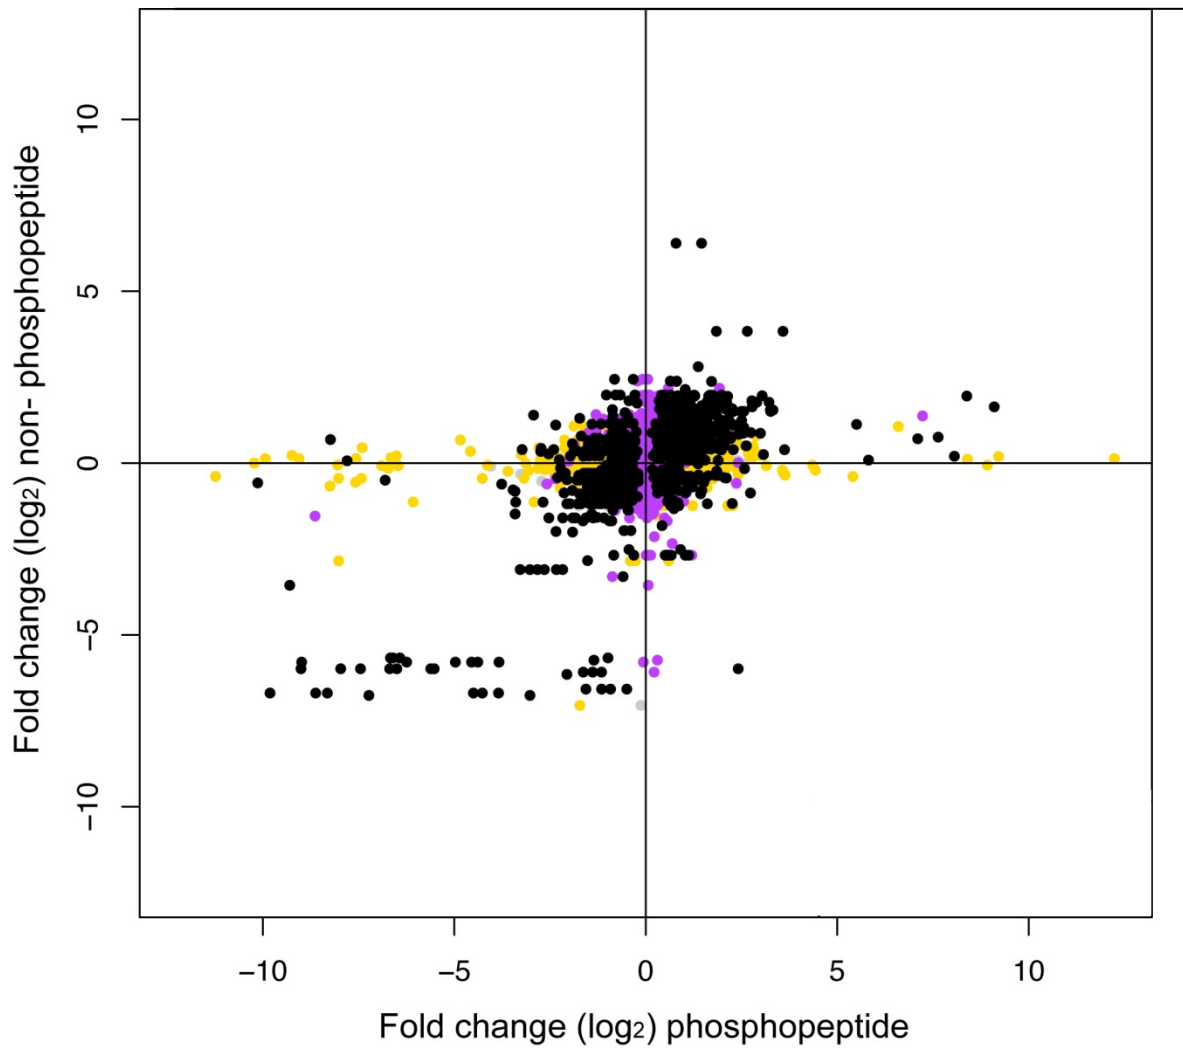

**Fig. S5.** Regulation of phosphopeptides versus regulation of protein abundance. Each dot corresponds to a measured phosphopeptide. The x-axis shows the fold-change (on a log<sub>2</sub> scale) of the phosphopeptide and the y-axis shows the median change observed for all of the non-phosphorylated peptides that map to those particular proteins (both shown on a log<sub>2</sub> scale). The color code illustrates whether the observed fold-change was significant in one or both of the measurements. ● denotes significant regulation detected in both phosphorylated and nonphosphorylated peptides; ● denotes significant regulation only for the phosphorylated peptide detected; ● denotes significant regulation only for the nonphosphorylated peptide detected; and ● denotes no significant regulation of any peptide detected.

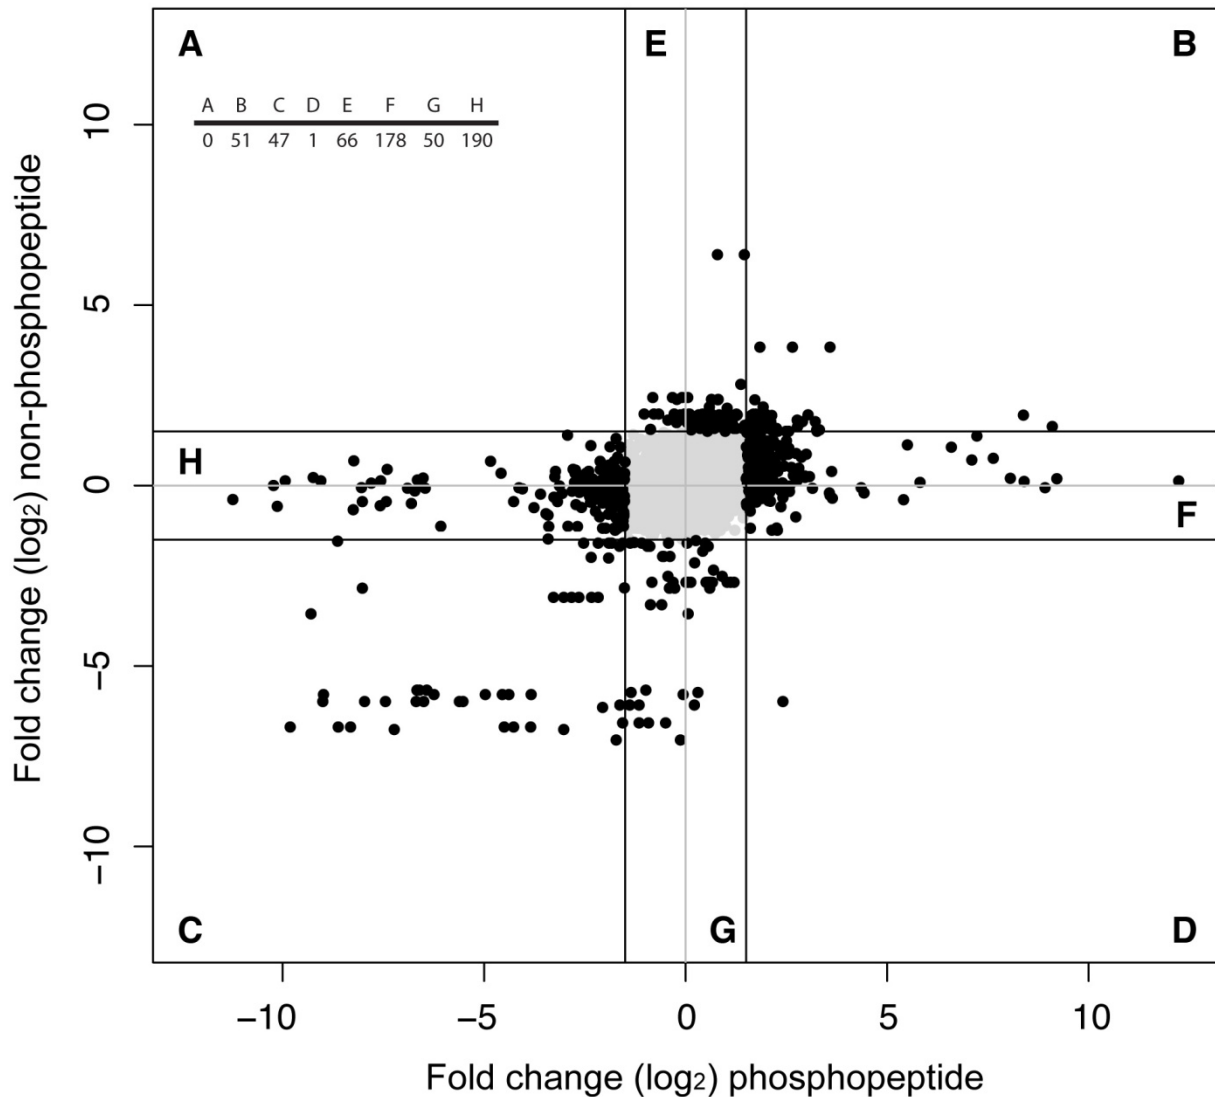

**Fig. S6.** Regulation of phosphopeptides versus regulation of protein abundance. The data shown are the same as those presented in fig. S5, but events that occurred below our standard fold-change cutoff are masked. This treatment enables us to see that the majority of the observed regulated changes in phosphopeptide abundance did not correspond to a change in protein abundance, but presumably in the occupancy of the phosphorylation sites. Note that this plot is based on a limited set of kinases (16 kinases), ranging from those that did not show any detectable impact on the phosphoproteome to those showing a large number of regulated phosphorylated peptides.

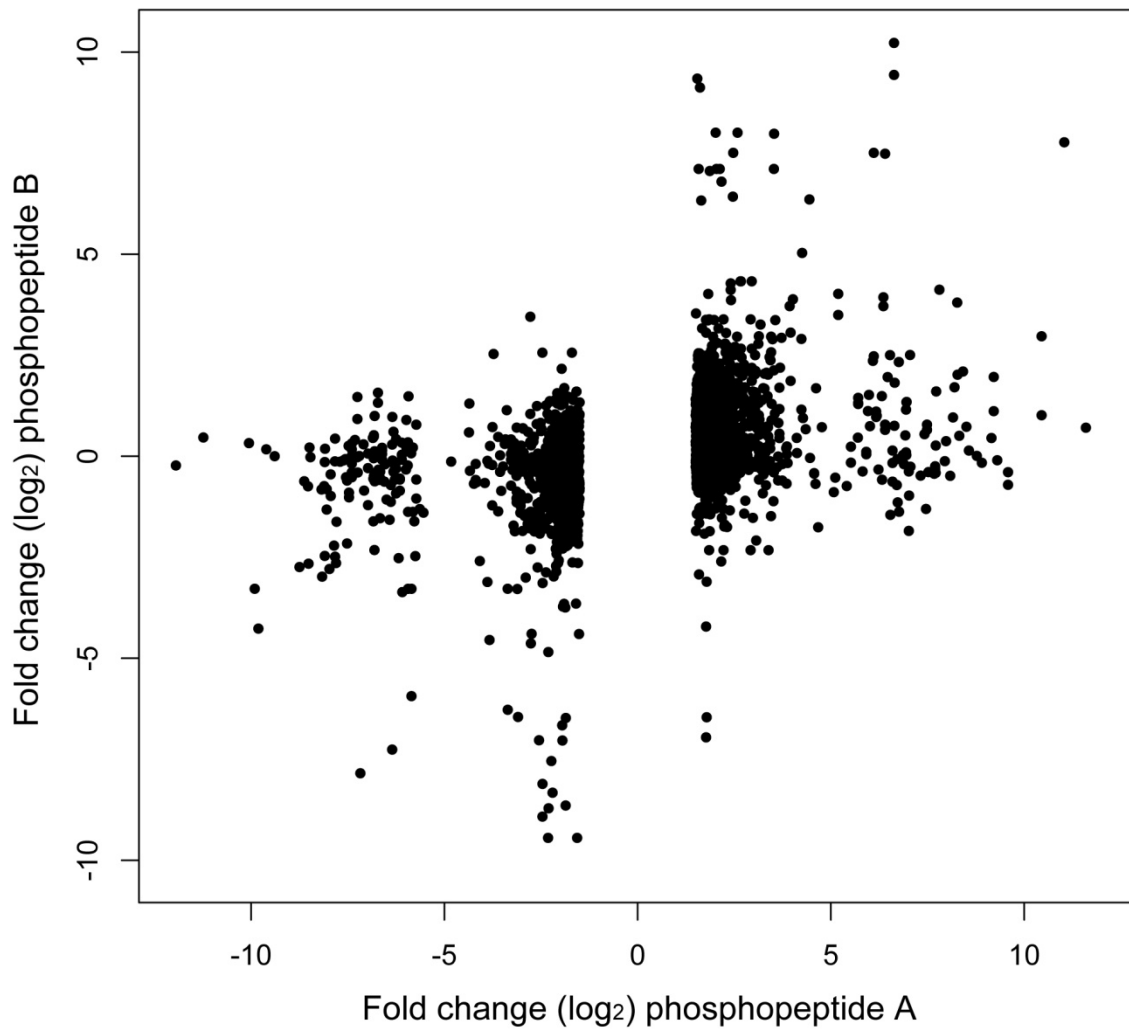

**Fig. S7.** Regulation of phosphopeptides that map to the same protein. On the x-axis are plotted phosphopeptides that were significantly regulated ( $P < 0.015$ ; fold-change  $\log_2 > 1.5$ ), whereas on the y-axis are plotted phosphopeptides that map to the corresponding phosphoprotein, irrespective of their significance or fold-change. In the majority of cases only one of the phosphopeptides that maps to a given phosphoprotein was regulated, indicating that the observed phosphorylation events were not due to a change in protein abundance.

**Table S2.** False discovery rate of peptide identification and specificity of phosphopeptide enrichment\* for each analyzed phosphorylation pattern.

| <b>Kinase or phosphatase</b> | <b>Standard name</b> | <b>Group</b>    | <b>FDR</b> | <b>% phosphopeptides*</b> |
|------------------------------|----------------------|-----------------|------------|---------------------------|
| YAL017W                      | PSK1                 | Other           | 0.05       | 86                        |
| YAR019C                      | CDC15                | STE             | 0.03       | 79                        |
| YBL009W                      | ALK2                 |                 | 0.05       | 81                        |
| YBL016W                      | FUS3                 | CMGC            | 0.04       | 83                        |
| YBL056W                      | PTC3                 | STP             | 0.03       | 74                        |
| YBL088C                      | TEL1                 | Inositol Kinase | 0.03       | 76                        |
| YBR028C                      |                      | AGC             | 0.05       | 86                        |
| YBR059C                      | AKL1                 | Other           | 0.03       | 80                        |
| YBR097W                      | VPS15                | Other           | 0.03       | 73                        |
| YBR125C                      | PTC4                 | STP             | 0.02       | 76                        |
| YBR160W                      | CDC28                | CMGC            | 0.03       | 79                        |
| YBR274W                      | CHK1                 | Other           | 0.03       | 79                        |
| YBR276C                      | PPS1                 |                 | 0.04       | 83                        |
| YCR008W                      | SAT4                 | Other           | 0.04       | 82                        |
| YCR079W                      | PTC6                 | STP             | 0.04       | 85                        |
| YCR091W                      | KIN82                | AGC             | 0.03       | 75                        |
| YDL006W                      | PTC1                 | STP             | 0.03       | 74                        |
| YDL025C                      | RTK1                 | Other           | 0.03       | 80                        |
| YDL028C                      | MPS1                 | Other           | 0.03       | 79                        |
| YDL047W                      | SIT4                 | STP             | 0.03       | 84                        |
| YDL079C                      | MRK1                 | CMGC            | 0.04       | 74                        |
| YDL101C                      | DUN1                 |                 | 0.03       | 74                        |
| YDL108W                      | KIN28                | CMGC            | 0.03       | 78                        |
| YDL134C                      | PPH21                | STP             | 0.05       | 77                        |
| YDL188C                      | PPH22                | STP             | 0.05       | 85                        |
| YDL214C                      | PRR2                 | Other           | 0.04       | 85                        |
| YDL230W                      | PTP1                 | PTP             | 0.04       | 87                        |
| YDR075W                      | PPH3                 | STP             | 0.05       | 82                        |
| YDR122W                      | KIN1                 | CAMK            | 0.05       | 77                        |
| YDR247W                      | VHS1                 | Other           | 0.03       | 81                        |
| YDR283C                      | GCN2                 | Other           | 0.04       | 84                        |
| YDR466W                      | PKH3                 | AGC             | 0.03       | 83                        |
| YDR477W                      | SNF1                 | CAMK            | 0.03       | 87                        |
| YDR523C                      | SPS1                 | STE             | 0.03       | 81                        |
| YER129W                      | SAK1                 |                 | 0.04       | 82                        |
| YFR014C                      | CMK1                 | CAMK            | 0.05       | 86                        |
| YGL021W                      | ALK1                 |                 | 0.04       | 86                        |
| YGL059W                      | PKP2                 | Atypical PK     | 0.04       | 83                        |



Table S2 continued.

| <b>Kinase or phosphatase</b> | <b>Standard name</b> | <b>Group</b>    | <b>FDR</b> | <b>% phosphopeptides*</b> |
|------------------------------|----------------------|-----------------|------------|---------------------------|
| YGL179C                      | TOS3                 | CAMK            | 0.05       | 86                        |
| YGL180W                      | ATG1                 | Other           | 0.03       | 75                        |
| YGR040W                      | KSS1                 | CMGC            | 0.03       | 86                        |
| YGR123C                      | PPT1                 | STP             | 0.04       | 66                        |
| YGR188C                      | BUB1                 | Other           | 0.04       | 86                        |
| YGR203W                      | YCH1                 |                 | 0.04       | 82                        |
| YGR262C                      | BUD32                | Microbial PK    | 0.03       | 76                        |
| YHR030C                      | SLT2                 | CMGC            | 0.06       | 82                        |
| YHR076W                      | PTC7                 |                 | 0.04       | 83                        |
| YHR082C                      | KSP1                 |                 | 0.05       | 78                        |
| YHR135C                      | YCK1                 | CKI             | 0.04       | 85                        |
| YIL035C                      | CKA1                 | Other           | 0.05       | 80                        |
| YIL042C                      | PKP1                 | Atypical PK     | 0.05       | 86                        |
| YIL095W                      | PRK1                 | Other           | 0.06       | 83                        |
| YIL113W                      | SDP1                 |                 | 0.04       | 75                        |
| YIR026C                      | YVH1                 |                 | 0.03       | 81                        |
| YJL095W                      | BCK1                 | STE             | 0.05       | 85                        |
| YJL106W                      | IME2                 | CMGC            | 0.02       | 75                        |
| YJL128C                      | PBS2                 | STE             | 0.02       | 71                        |
| YJL164C                      | TPK1                 | AGC             | 0.05       | 83                        |
| YJL165C                      | HAL5                 | Other           | 0.04       | 77                        |
| YJL187C                      | SWE1                 | Other           | 0.03       | 75                        |
| YJR059W                      | PTK2                 | Other           | 0.03       | 84                        |
| YJR066W                      | TOR1                 | Inositol Kinase | 0.04       | 82                        |
| YKL048C                      | ELM1                 |                 | 0.03       | 73                        |
| YKL101W                      | HSL1                 | CAMK            | 0.04       | 82                        |
| YKL116C                      | PRR1                 | CAMK/EMK        | 0.05       | 83                        |
| YKL126W                      | YPK1                 | AGC             | 0.05       | 83                        |
| YKL139W                      | CTK1                 | CMGC            | 0.04       | 83                        |
| YKL161C                      | KDX1                 | CMGC            | 0.05       | 86                        |
| YKL166C                      | TPK3                 | AGC             | 0.04       | 84                        |
| YKL168C                      | KKQ8                 | Other           | 0.04       | 80                        |
| YKL171W                      | NNK1                 | Yeast PK        | 0.04       | 84                        |
| YKL198C                      | PTK1                 | Other           | 0.03       | 72                        |
| YLL010C                      | PSR1                 |                 | 0.05       | 77                        |
| YLL019C                      | KNS1                 | CMGC            | 0.05       | 86                        |
| YLR019W                      | PSR2                 |                 | 0.03       | 82                        |
| YLR096W                      | KIN2                 | CAMK            | 0.04       | 76                        |

Table S2 continued.

| <b>Kinase or phosphatase</b> | <b>Standard name</b> | <b>Group</b>    | <b>FDR</b> | <b>% phosphopeptides*</b> |
|------------------------------|----------------------|-----------------|------------|---------------------------|
| YLR113W                      | HOG1                 | CMGC            | 0.04       | 83                        |
| YLR240W                      | VPS34                | Inositol Kinase | 0.04       | 75                        |
| YLR248W                      | RCK2                 |                 | 0.03       | 74                        |
| YLR362W                      | STE11                | STE             | 0.04       | 84                        |
| YLR433C                      | CNA1                 | STP             | 0.05       | 86                        |
| YML016C                      | PPZ1                 | STP             | 0.04       | 83                        |
| YML057W                      | CMP2                 | STP             | 0.05       | 86                        |
| YMR104C                      | YPK2                 | AGC             | 0.04       | 78                        |
| YMR139W                      | RIM11                |                 | 0.03       | 82                        |
| YMR216C                      | SKY1                 | CMGC            | 0.04       | 83                        |
| YMR291W                      |                      | CAMK            | 0.04       | 80                        |
| YNL020C                      | ARK1                 | Other           | 0.04       | 84                        |
| YNL032W                      | SIW14                | PTP             | 0.03       | 86                        |
| YNL099C                      | OCA1                 |                 | 0.03       | 79                        |
| YNL154C                      | YCK2                 | CKI             | 0.04       | 65                        |
| YNL161W                      | CBK1                 | AGC             | 0.03       | 80                        |
| YNL298W                      | CLA4                 | STE             | 0.06       | 87                        |
| YNL307C                      | MCK1                 |                 | 0.04       | 73                        |
| YNR031C                      | SSK2                 | STE             | 0.04       | 78                        |
| YNR032W                      | PPG1                 | STP             | 0.05       | 86                        |
| YOL016C                      | CMK2                 | CAMK            | 0.04       | 84                        |
| YOL045W                      | PSK2                 | Other           | 0.03       | 86                        |
| YOL100W                      | PKH2                 | AGC             | 0.04       | 81                        |
| YOL113W                      | SKM1                 | STE             | 0.03       | 84                        |
| YOL128C                      | YGK3                 | CMGC            | 0.04       | 85                        |
| YOR061W                      | CKA2                 | Other           | 0.05       | 79                        |
| YOR090C                      | PTC5                 | STP             | 0.03       | 84                        |
| YOR119C                      | RIO1                 |                 | 0.03       | 80                        |
| YOR208W                      | PTP2                 | PTP             | 0.04       | 84                        |
| YOR231W                      | MKK1                 | STE             | 0.03       | 87                        |
| YOR233W                      | KIN4                 | CAMK            | 0.04       | 67                        |
| YOR267C                      | HRK1                 | Other           | 0.04       | 84                        |
| YOR351C                      | MEK1                 |                 | 0.03       | 84                        |
| YPL026C                      | SKS1                 |                 | 0.05       | 86                        |
| YPL031C                      | PHO85                | CMGC            | 0.06       | 80                        |
| YPL042C                      | SSN3                 | CMGC            | 0.06       | 81                        |
| YPL140C                      | MKK2                 | STE             | 0.03       | 72                        |
| YPL141C                      | FRK1                 | CAMK            | 0.03       | 72                        |
| YPL150W                      |                      | CAMK            | 0.04       | 85                        |

Table S2 continued.

| <b>Kinase or phosphatase</b> | <b>Standard name</b> | <b>Group</b> | <b>FDR</b> | <b>% phosphopeptides*</b> |
|------------------------------|----------------------|--------------|------------|---------------------------|
| YPL179W                      | PPQ1                 |              | 0.05       | 82                        |
| YPL203W                      | TPK2                 | AGC          | 0.04       | 83                        |
| YPL204W                      | HRR25                | CKI          | 0.03       | 78                        |
| YPL236C                      |                      | Other        | 0.03       | 80                        |
| YPR054W                      | SMK1                 | CMGC         | 0.05       | 86                        |
| YPR073C                      | LTP1                 | DSP          | 0.03       | 79                        |
| YPR106W                      | ISR1                 | Yeast<br>PK  | 0.05       | 82                        |
| YPR111W                      | DBF20                | AGC          | 0.04       | 86                        |
| YPR161C                      | SGV1                 | CMGC         | 0.03       | 80                        |

\*“Specificity of phosphopeptide enrichment” / “% phosphopeptides”: For a definition see Supplementary Materials description of “Database searches” and Bodenmiller *et al.* (7). The actual enrichment of phosphopeptides in the sample was likely even higher (for details see the Material and Methods).

**Table S4.** Significant coregulation of kinases and phosphatases.

| Phosphatase | Standard name | Group | Kinase  | Standard name | Group        | P value  | Spearman correlation coefficient |
|-------------|---------------|-------|---------|---------------|--------------|----------|----------------------------------|
| YDR075W     | PPH3          | STP   | YIL095W | PRK1          | Other        | 0.00E+00 | 0.97                             |
| YDL230W     | PTP1          | PTP   | YIL042C | PKP1          | Atypical PK  | 0.00E+00 | 0.95                             |
| YNL099C     | OCA1          |       | YGR262C | BUD32         | Microbial PK | 0.00E+00 | 0.95                             |
| YDL230W     | PTP1          | PTP   | YPL026C | SKS1          |              | 0.00E+00 | 0.94                             |
| YML057W     | CMP2          | STP   | YAL017W | PSK1          | Other        | 0.00E+00 | 0.92                             |
| YCR079W     | PTC6          | STP   | YGL059W | PKP2          | Atypical PK  | 0.00E+00 | 0.9                              |
| YIR026C     | YVH1          |       | YDL025C | RTK1          | Other        | 0.00E+00 | 0.89                             |
| YGR203W     | YCH1          |       | YGR262C | BUD32         | Microbial PK | 0.00E+00 | 0.86                             |
| YNL032W     | SIW14         | PTP   | YDR477W | SNF1          | CAMK         | 1.02E-04 | 0.85                             |
| YML057W     | CMP2          | STP   | YIL042C | PKP1          | Atypical PK  | 2.23E-04 | 0.87                             |
| YLL010C     | PSR1          |       | YIL035C | CKA1          | Other        | 2.39E-04 | 0.88                             |
| YLL010C     | PSR1          |       | YOR061W | CKA2          | Other        | 2.53E-04 | 0.71                             |
| YDL047W     | SIT4          | STP   | YKL198C | PTK1          | Other        | 4.84E-04 | 0.84                             |
| YML057W     | CMP2          | STP   | YCR008W | SAT4          | Other        | 5.77E-04 | 0.94                             |
| YLR019W     | PSR2          |       | YMR139W | RIM11         |              | 8.09E-04 | 0.82                             |
| YLL010C     | PSR1          |       | YOL045W | PSK2          | Other        | 1.26E-03 | 0.72                             |
| YDR075W     | PPH3          | STP   | YPL203W | TPK2          | AGC          | 1.48E-03 | 0.75                             |
| YLL010C     | PSR1          |       | YKL166C | TPK3          | AGC          | 2.04E-03 | 0.88                             |
| YNL099C     | OCA1          |       | YFR014C | CMK1          | CAMK         | 4.25E-03 | 0.88                             |
| YDL230W     | PTP1          | PTP   | YAL017W | PSK1          | Other        | 9.45E-03 | 0.86                             |
| YNL099C     | OCA1          |       | YMR291W |               | CAMK         | 9.87E-03 | 0.76                             |
| YNL099C     | OCA1          |       | YIL042C | PKP1          | Atypical PK  | 1.03E-02 | 0.84                             |
| YLR019W     | PSR2          |       | YKL171W | NNK1          | Yeast PK     | 1.73E-02 | 0.98                             |
| YDL230W     | PTP1          | PTP   | YDR477W | SNF1          | CAMK         | 2.24E-02 | 0.76                             |
| YML057W     | CMP2          | STP   | YOR231W | MKK1          | STE          | 2.40E-02 | 0.74                             |
| YLR019W     | PSR2          |       | YIL042C | PKP1          | Atypical PK  | 2.48E-02 | 0.88                             |
| YLR019W     | PSR2          |       | YOL045W | PSK2          | Other        | 2.48E-02 | 0.88                             |
| YDL047W     | SIT4          | STP   | YKL139W | CTK1          | CMGC         | 3.47E-02 | 0.67                             |
| YDL230W     | PTP1          | PTP   | YKL101W | HSL1          | CAMK         | 3.83E-02 | 0.92                             |
| YLL010C     | PSR1          |       | YCR008W | SAT4          | Other        | 4.12E-02 | 0.83                             |
| YGR203W     | YCH1          |       | YNL307C | MCK1          |              | 4.12E-02 | 0.81                             |
| YIR026C     | YVH1          |       | YKL166C | TPK3          | AGC          | 4.12E-02 | 0.81                             |
| YNL099C     | OCA1          |       | YBR274W | CHK1          | Other        | 4.12E-02 | 0.78                             |
| YLR019W     | PSR2          |       | YAL017W | PSK1          | Other        | 4.12E-02 | 0.78                             |
| YDL047W     | SIT4          | STP   | YGR262C | BUD32         | Microbial PK | 4.12E-02 | 0.75                             |
| YLR019W     | PSR2          |       | YFR014C | CMK1          | CAMK         | 4.59E-02 | 0.85                             |
| YLL010C     | PSR1          |       | YOR231W | MKK1          | STE          | 4.90E-02 | 0.73                             |

**Table S5.** Overlap of data from this study with other data sets.

|                  | All <sup>#</sup> | Expected direction |               | Inverted direction |               |
|------------------|------------------|--------------------|---------------|--------------------|---------------|
|                  |                  |                    | Full response |                    | Full response |
| STRING (28)      | 293<br>(285)**   | 162**              | 26**          | 131                | 14            |
| SGD (29)         | 170<br>(168)     | 93*                | 22**          | 77                 | 6             |
| Fiedler (30)     | 39**             | 28**               | 4*            | 11                 | 2             |
| PhosphoGrid (31) | 16*              | 10*                | 3             | 6                  | 0             |

\*Significant ( $P < 0.05$ )

\*\*Highly significant ( $P < 0.01$ )

<sup>#</sup>Given numbers are observed regulatory events, whereas numbers in parentheses indicate the corresponding number of proteins.

**Table S7.** Overlap of possible direct targets with other data sets.

|                  | All   | Expected direction |               | Inverted direction |               |
|------------------|-------|--------------------|---------------|--------------------|---------------|
|                  |       |                    | Full response |                    | Full response |
| PhosphoGrid (31) | 3     | 2                  | 0             | 1                  | 0             |
| STRING (28)      | 109** | 60**               | 14**          | 50*                | 3             |

\*Significant ( $P < 0.05$ )

\*\*Highly significant ( $P < 0.01$ )

**Table S8.** Effects of each kinase and phosphatase on the phosphoproteome. Growth speed is defined according to Hillenmeyer *et al.* (24) and phenotypes were defined according to Ohya *et al.* (23).

| <b>Systematic name</b> | <b>Standard name</b> | <b>Kinase or phosphatase group</b> | <b>Impact rank<sup>1</sup></b> | <b>Growth phenotype*</b> | <b>Morphology phenotype*</b> |
|------------------------|----------------------|------------------------------------|--------------------------------|--------------------------|------------------------------|
| YDL079C                | MRK1                 | CMGC                               | 1                              |                          |                              |
| YML016C                | PPZ1                 | STP                                | 2                              |                          |                              |
| YDR283C                | GCN2                 | Other                              | 4                              |                          |                              |
| YJL187C                | SWE1                 | Other                              | 5                              |                          | +                            |
| YBL056W                | PTC3                 | STP                                | 6                              |                          |                              |
| YGL180W                | ATG1                 | Other                              | 7                              |                          |                              |
| YKL116C                | PRR1                 | CAMK/EMK                           | 8                              |                          |                              |
| YER129W                | SAK1                 |                                    | 9                              | +                        |                              |
| YPR073C                | LTP1                 | DSP                                | 10                             | +                        | +                            |
| YGR040W                | KSS1                 | CMGC                               | 11                             | +                        |                              |
| YHR076W                | PTC7                 |                                    | 12                             |                          |                              |
| YDR122W                | KIN1                 | CAMK                               | 13                             |                          | +                            |
| YOR267C                | HRK1                 | Other                              | 14                             |                          |                              |
| YKL048C                | ELM1                 |                                    | 15                             |                          | ++                           |
| YLR248W                | RCK2                 |                                    | 16                             | +                        |                              |
| YOL016C                | CMK2                 | CAMK                               | 17                             |                          |                              |
| YCR091W                | KIN82                | AGC                                | 18                             | +                        |                              |
| YBR028C                |                      | AGC                                | 19                             |                          | +                            |
| YPL236C                |                      | Other                              | 20                             |                          |                              |
| YNL161W                | CBK1                 | AGC                                | 21                             |                          |                              |
| YIL113W                | SDP1                 |                                    | 22                             |                          |                              |
| YPL150W                |                      | CAMK                               | 23                             |                          |                              |
| YHR082C                | KSP1                 |                                    | 24                             |                          | +                            |
| YOR351C                | MEK1                 |                                    | 25                             |                          |                              |
| YDR247W                | VHS1                 | Other                              | 26                             | +                        |                              |
| YOL113W                | SKM1                 | STE                                | 27                             |                          | +                            |
| YBL009W                | ALK2                 |                                    | 28                             |                          |                              |
| YLR362W                | STE11                | STE                                | 29                             |                          |                              |
| YDL028C                | MPS1                 | Other                              | 30                             |                          |                              |
| YDR523C                | SPS1                 | STE                                | 31                             |                          | ++                           |
| YDL101C                | DUN1                 |                                    | 32                             |                          |                              |
| YPL141C                | FRK1                 | CAMK                               | 33                             |                          |                              |
| YPR161C                | SGV1                 | CMGC                               | 34                             |                          |                              |

<sup>1</sup>Highest impact = 124, lowest impact = 1. \*Compared to wild-type; “+”, strong; “++”, very strong (see Material and Methods).

**Table S8** continued.

| <b>Systematic name</b> | <b>Standard name</b> | <b>Kinase or phosphatase group</b> | <b>Impact rank</b> | <b>Growth phenotype*</b> | <b>Morphology phenotype*</b> |
|------------------------|----------------------|------------------------------------|--------------------|--------------------------|------------------------------|
| YGL179C                | TOS3                 | CAMK                               | 35                 |                          |                              |
| YOR090C                | PTC5                 | STP                                | 36                 |                          | +                            |
| YOL128C                | YGK3                 | CMGC                               | 37                 |                          |                              |
| YKL161C                | KDX1                 | CMGC                               | 38                 |                          | +                            |
| YKL168C                | KKQ8                 | Other                              | 39                 |                          | +                            |
| YPL204W                | HRR25                | CKI                                | 40                 |                          |                              |
| YOR119C                | RIO1                 |                                    | 41                 |                          |                              |
| YBL088C                | TEL1                 | Inositol Kinase                    | 42                 |                          | +                            |
| YLR113W                | HOG1                 | CMGC                               | 43                 | +                        | +                            |
| YJL128C                | PBS2                 | STE                                | 44                 |                          | +                            |
| YGR123C                | PPT1                 | STP                                | 45                 |                          |                              |
| YBL016W                | FUS3                 | CMGC                               | 46                 |                          | ++                           |
| YJL095W                | BCK1                 | STE                                | 47                 | ++                       | +                            |
| YPR106W                | ISR1                 | Yeast PK                           | 48                 | +                        |                              |
| YPL179W                | PPQ1                 |                                    | 49                 |                          |                              |
| YHR030C                | SLT2                 | CMGC                               | 50                 | ++                       | +                            |
| YDL214C                | PRR2                 | Other                              | 51                 |                          |                              |
| YJL106W                | IME2                 | CMGC                               | 52                 |                          |                              |
| YDL006W                | PTC1                 | STP                                | 53                 |                          | ++                           |
| YMR104C                | YPK2                 | AGC                                | 54                 |                          | +                            |
| YGL021W                | ALK1                 |                                    | 55                 |                          |                              |
| YPR054W                | SMK1                 | CMGC                               | 56                 | +                        |                              |
| YAR019C                | CDC15                | STE                                | 57                 |                          |                              |
| YOR233W                | KIN4                 | CAMK                               | 58                 |                          |                              |
| YOR208W                | PTP2                 | PTP                                | 59                 | +                        |                              |
| YBR059C                | AKL1                 | Other                              | 60                 | +                        |                              |
| YNL020C                | ARK1                 | Other                              | 61                 |                          | +                            |
| YBR160W                | CDC28                | CMGC                               | 62                 |                          |                              |
| YNR032W                | PPG1                 | STP                                | 63                 |                          | +                            |
| YJR059W                | PTK2                 | Other                              | 64                 | +                        |                              |
| YLR096W                | KIN2                 | CAMK                               | 65                 |                          |                              |
| YJL164C                | TPK1                 | AGC                                | 66                 |                          | +                            |
| YGR188C                | BUB1                 | Other                              | 67                 |                          |                              |
| YBR097W                | VPS15                | Other                              | 68                 |                          | ++                           |

<sup>1</sup> Highest impact = 124, lowest impact = 1. \*Compared to wild type; “+”, strong; “++”, very strong (see Material and Methods).

**Table S8** continued.

| <b>Systematic name</b> | <b>Standard name</b> | <b>Kinase phosphatase group</b> | <b>or</b> | <b>Impact rank</b> | <b>Growth phenotype*</b> | <b>Morphology phenotype*</b> |
|------------------------|----------------------|---------------------------------|-----------|--------------------|--------------------------|------------------------------|
| YPR111W                | DBF20                | AGC                             |           | 69                 |                          |                              |
| YDL108W                | KIN28                | CMGC                            |           | 70                 |                          |                              |
| YMR139W                | RIM11                |                                 |           | 71                 |                          |                              |
| YNL032W                | SIW14                | PTP                             |           | 72                 | +                        | +                            |
| YBR125C                | PTC4                 | STP                             |           | 73                 |                          |                              |
| YJL165C                | HAL5                 | Other                           |           | 74                 | ++                       |                              |
| YDL025C                | RTK1                 | Other                           |           | 75                 |                          |                              |
| YNR031C                | SSK2                 | STE                             |           | 76                 |                          | +                            |
| YLL019C                | KNS1                 | CMGC                            |           | 77                 |                          |                              |
| YLR019W                | PSR2                 |                                 |           | 78                 |                          |                              |
| YBR274W                | CHK1                 | Other                           |           | 79                 |                          |                              |
| YMR216C                | SKY1                 | CMGC                            |           | 80                 | ++                       | ++                           |
| YPL140C                | MKK2                 | STE                             |           | 81                 |                          |                              |
| YFR014C                | CMK1                 | CAMK                            |           | 82                 |                          |                              |
| YJR066W                | TOR1                 | Inositol Kinase                 |           | 83                 |                          |                              |
| YIL095W                | PRK1                 | Other                           |           | 84                 |                          |                              |
| YOL100W                | PKH2                 | AGC                             |           | 85                 |                          |                              |
| YNL298W                | CLA4                 | STE                             |           | 86                 |                          | ++                           |
| YDR466W                | PKH3                 | AGC                             |           | 87                 |                          | +                            |
| YMR291W                |                      | CAMK                            |           | 88                 |                          |                              |
| YGL059W                | PKP2                 | Atypical PK                     |           | 89                 |                          |                              |
| YDR075W                | PPH3                 | STP                             |           | 90                 | ++                       |                              |
| YLR433C                | CNA1                 | STP                             |           | 91                 |                          |                              |
| YBR276C                | PPS1                 |                                 |           | 92                 |                          | +                            |
| YML057W                | CMP2                 | STP                             |           | 93                 |                          |                              |
| YDL188C                | PPH22                | STP                             |           | 94                 |                          |                              |
| YCR008W                | SAT4                 | Other                           |           | 95                 | +                        |                              |
| YNL099C                | OCA1                 |                                 |           | 96                 | ++                       |                              |
| YCR079W                | PTC6                 | STP                             |           | 97                 | +                        |                              |
| YLR240W                | VPS34                | Inositol Kinase                 |           | 98                 |                          | +                            |
| YIL035C                | CKA1                 | Other                           |           | 99                 | +                        | +                            |
| YPL031C                | PHO85                | CMGC                            |           | 100                |                          | +                            |
| YPL026C                | SKS1                 |                                 |           | 101                |                          | +                            |
| YOR061W                | CKA2                 | Other                           |           | 102                | +                        | ++                           |

<sup>1</sup> Highest impact = 124, lowest impact = 1. \* compared to wild type; “+” strong, “++” very strong (See Material and Methods).



**Table S8** continued.

| <b>Systematic name</b> | <b>Standard name</b> | <b>Kinase or phosphatase group</b> | <b>Impact rank</b> | <b>Growth phenotype*</b> | <b>Morphology phenotype*</b> |
|------------------------|----------------------|------------------------------------|--------------------|--------------------------|------------------------------|
| YOR231W                | MKK1                 | STE                                | 103                |                          | ++                           |
| YDL134C                | PPH21                | STP                                | 104                |                          |                              |
| YGR203W                | YCH1                 |                                    | 105                |                          |                              |
| YKL101W                | HSL1                 | CAMK                               | 106                |                          | ++                           |
| YAL017W                | PSK1                 | Other                              | 107                |                          |                              |
| YKL171W                | NNK1                 | Yeast PK                           | 108                |                          | +                            |
| YKL166C                | TPK3                 | AGC                                | 109                |                          |                              |
| YHR135C                | YCK1                 | CKI                                | 110                | +                        |                              |
| YIL042C                | PKP1                 | Atypical PK                        | 111                |                          | +                            |
| YDL230W                | PTP1                 | PTP                                | 112                |                          |                              |
| YPL203W                | TPK2                 | AGC                                | 113                |                          |                              |
| YNL307C                | MCK1                 |                                    | 114                | ++                       | +                            |
| YIR026C                | YVH1                 |                                    | 115                | +                        | ++                           |
| YGR262C                | BUD32                | Microbial PK                       | 116                |                          | ++                           |
| YKL126W                | YPK1                 | AGC                                | 117                | ++                       | ++                           |
| YPL042C                | SSN3                 | CMGC                               | 118                |                          | ++                           |
| YDL047W                | SIT4                 | STP                                | 119                |                          | ++                           |
| YLL010C                | PSR1                 |                                    | 120                |                          | +                            |
| YDR477W                | SNF1                 | CAMK                               | 121                | ++                       |                              |
| YKL198C                | PTK1                 | Other                              | 122                |                          |                              |
| YOL045W                | PSK2                 | Other                              | 123                | +                        |                              |
| YKL139W                | CTK1                 | CMGC                               | 124                |                          | ++                           |

<sup>†</sup>Highest impact = 124; lowest impact = 1.

\*Compared to wild-type; “+”, strong; “++”, very strong (see Material and Methods).

**Table S9.** Enrichment of biological process among the low-impact kinases (bottom half). n.d., not determined.

| <b>Biological process</b>                                                          | <b><i>P</i> value</b> | <b>Corresponding <i>P</i> value for bottom half kinases</b> |
|------------------------------------------------------------------------------------|-----------------------|-------------------------------------------------------------|
| protein kinase cascade                                                             | 1.9E-11               | 5.8E-05                                                     |
| MAPKKK cascade                                                                     | 3.9E-10               | 8.6E-04                                                     |
| osmosensory signaling pathway                                                      | 5.6E-10               | 1.8E-01                                                     |
| cell surface receptor linked signal transduction                                   | 1.8E-09               | 9.8E-02                                                     |
| primary metabolic process                                                          | 3.4E-09               | 3.0E-07                                                     |
| cellular metabolic process                                                         | 1.1E-08               | 8.3E-06                                                     |
| MAPKKK cascade during osmolarity sensing                                           | 2.4E-08               | 9.6E-02                                                     |
| metabolic process                                                                  | 5.9E-08               | 3.4E-05                                                     |
| regulation of MAP kinase activity                                                  | 9.3E-08               | n.d.                                                        |
| response to osmotic stress                                                         | 1.2E-07               | 5.8E-01                                                     |
| regulation of cell cycle                                                           | 2.4E-07               | 1.2E-04                                                     |
| regulation of molecular function                                                   | 2.6E-07               | 1.3E-02                                                     |
| regulation of protein kinase activity                                              | 4.9E-07               | 2.7E-01                                                     |
| intracellular signaling cascade                                                    | 5.6E-07               | 5.6E-07                                                     |
| regulation of kinase activity                                                      | 5.9E-07               | 2.8E-01                                                     |
| regulation of conjugation                                                          | 7.1E-07               | 2.8E-01                                                     |
| regulation of conjugation with cellular fusion                                     | 7.1E-07               | 2.8E-01                                                     |
| regulation of multi-organism process                                               | 7.1E-07               | 2.8E-01                                                     |
| regulation of transferase activity                                                 | 8.4E-07               | 2.9E-01                                                     |
| regulation of catalytic activity                                                   | 1.5E-06               | 5.1E-02                                                     |
| response to stimulus                                                               | 1.9E-06               | 4.7E-07                                                     |
| regulation of cell division                                                        | 2.1E-06               | 3.3E-01                                                     |
| response to pheromone                                                              | 4.2E-06               | 7.1E-02                                                     |
| cell cycle                                                                         | 5.5E-06               | 5.5E-06                                                     |
| regulation of cellular component organization and biogenesis                       | 6.4E-06               | 5.0E-03                                                     |
| inactivation of MAPK activity during osmolarity sensing                            | 7.2E-06               | n.d.                                                        |
| inactivation of MAPK activity                                                      | 7.2E-06               | n.d.                                                        |
| protein amino acid autophosphorylation                                             | 7.2E-06               | 4.5E-02                                                     |
| negative regulation of MAP kinase activity                                         | 7.2E-06               | n.d.                                                        |
| negative regulation of protein kinase activity                                     | 1.4E-05               | n.d.                                                        |
| negative regulation of transcription by pheromones                                 | 1.4E-05               | n.d.                                                        |
| negative regulation of transcription from RNA polymerase II promoter by pheromones | 1.4E-05               | n.d.                                                        |

| <b>Biological process</b>                                                     | <b><i>P</i> value</b> | <b>Corresponding <i>P</i> value for bottom half kinases</b> |
|-------------------------------------------------------------------------------|-----------------------|-------------------------------------------------------------|
| cell cycle checkpoint                                                         | 1.7E-05               | 2.2E-04                                                     |
| response to stress                                                            | 1.8E-05               | 1.8E-05                                                     |
| negative regulation of kinase activity                                        | 2.5E-05               | n.d.                                                        |
| regulation of cell morphogenesis                                              | 3.3E-05               | 1.6E-03                                                     |
| regulation of anatomical structure morphogenesis                              | 3.3E-05               | 1.6E-03                                                     |
| negative regulation of transferase activity                                   | 3.9E-05               | n.d.                                                        |
| regulation of developmental process                                           | 4.9E-05               | 2.1E-03                                                     |
| cell division                                                                 | 5.5E-05               | 8.8E-03                                                     |
| negative regulation of specific transcription from RNA polymerase II promoter | 5.9E-05               | n.d.                                                        |
| negative regulation of gene-specific transcription                            | 5.9E-05               | n.d.                                                        |
| regulation of meiosis                                                         | 6.9E-05               | n.d.                                                        |
| regulation of meiotic cell cycle                                              | 8.1E-05               | n.d.                                                        |
| negative regulation of conjugation                                            | 8.2E-05               | n.d.                                                        |
| negative regulation of conjugation with cellular fusion                       | 8.2E-05               | n.d.                                                        |
| negative regulation of multi-organism process                                 | 8.2E-05               | n.d.                                                        |
| regulation of transcription by pheromones                                     | 8.3E-05               | n.d.                                                        |
| regulation of transcription from RNA polymerase II promoter by pheromones     | 8.3E-05               | n.d.                                                        |

**Table S10.** Enrichment of biological process among the high-impact kinases (top half). n.d., not determined.

| <b>Biological process</b>             | <b><i>P</i> value</b> | <b>Corresponding <i>P</i> value for top half kinases</b> |
|---------------------------------------|-----------------------|----------------------------------------------------------|
| interphase of mitotic cell cycle      | 3.3E-09               | 2.7E-01                                                  |
| G1/S transition of mitotic cell cycle | 4.9E-09               | 3.4E-01                                                  |
| interphase                            | 5.2E-09               | 2.9E-01                                                  |
| primary metabolic process             | 3.0E-07               | 3.4E-09                                                  |
| response to stimulus                  | 4.7E-07               | 1.9E-06                                                  |
| intracellular signaling cascade       | 5.6E-07               | 5.6E-07                                                  |
| peptidyl-serine phosphorylation       | 7.3E-07               | n.d.                                                     |
| peptidyl-serine modification          | 7.3E-07               | n.d.                                                     |
| cell cycle phase                      | 1.2E-06               | 1.8E-02                                                  |
| mitotic cell cycle                    | 1.4E-06               | 8.7E-02                                                  |
| cell cycle process                    | 4.1E-06               | 3.0E-02                                                  |
| cell cycle                            | 5.5E-06               | 5.5E-06                                                  |
| cellular metabolic process            | 8.3E-06               | 1.1E-08                                                  |
| cellular ion homeostasis              | 1.1E-05               | 3.0E-01                                                  |
| cellular chemical homeostasis         | 1.1E-05               | 3.0E-01                                                  |
| ion homeostasis                       | 1.6E-05               | 3.2E-01                                                  |
| chemical homeostasis                  | 1.7E-05               | 3.2E-01                                                  |
| response to stress                    | 1.8E-05               | 1.8E-05                                                  |
| regulation of biological quality      | 2.1E-05               | 4.8E-03                                                  |
| cellular developmental process        | 2.1E-05               | 3.9E-04                                                  |
| cell morphogenesis                    | 2.2E-05               | 1.2E-04                                                  |
| anatomical structure morphogenesis    | 2.2E-05               | 1.2E-04                                                  |
| cellular structure morphogenesis      | 2.2E-05               | 1.2E-04                                                  |
| anatomical structure development      | 2.2E-05               | 1.2E-04                                                  |
| metabolic process                     | 3.4E-05               | 5.9E-08                                                  |
| protein kinase cascade                | 5.8E-05               | 1.9E-11                                                  |
| regulation of mitotic cell cycle      | 6.0E-05               | 1.5E-01                                                  |

**Table S12.** Overview of the entire data set.

|                 | <b>Total number</b>  | <b>Regulated</b>   | <b>Not regulated</b> |
|-----------------|----------------------|--------------------|----------------------|
| Phosphoproteins | 1,677 <sup>1</sup>   | 1,029 <sup>2</sup> | 648 <sup>3</sup>     |
| Phosphopeptides | 11,374 <sup>4</sup>  | 3,824 <sup>5</sup> | 7,550 <sup>6</sup>   |
| Phospho-Events  | 158,168 <sup>7</sup> | 8,814 <sup>8</sup> | 149,354 <sup>9</sup> |

<sup>1</sup>Number of all identified phosphoproteins in the dataset. <sup>2</sup>Number of all phosphoproteins that had at least one regulated phosphorylation site. <sup>3</sup>Number of all phosphoproteins that did not have any regulated phosphorylation site. <sup>4</sup>Number of all identified phosphopeptides in the dataset. <sup>5</sup>Number of all phosphopeptides that were considered to be regulated. <sup>6</sup>Number of all phosphopeptides that were not regulated. <sup>7</sup>Number of all individually identified phosphorylation sites per kinase or phosphatase. <sup>8</sup>Number of all individually identified regulated phosphorylation sites per kinase or phosphatase. <sup>9</sup>Number of all individually identified phosphorylation sites that were not regulated per kinase or phosphatase.

## References

1. A. H. Tong, C. Boone, Synthetic genetic array analysis in *Saccharomyces cerevisiae*. *Methods Mol. Biol.* **313**, 171-192 (2006).
2. A. C. Bishop, J. A. Ubersax, D. T. Petsch, D. P. Matheos, N. S. Gray, J. Blethrow, E. Shimizu, J. Z. Tsien, P. G. Schultz, M. D. Rose, J. L. Wood, D. O. Morgan, K. M. Shokat, A chemical switch for inhibitor-sensitive alleles of any protein kinase. *Nature* **407**, 395-401 (2000).
3. M. E. Burkard, C. L. Randall, S. Larochelle, C. Zhang, K. M. Shokat, R. P. Fisher, P. V. Jallepalli, Chemical genetics reveals the requirement for Polo-like kinase 1 activity in positioning RhoA and triggering cytokinesis in human cells. *Proc. Natl. Acad. Sci. USA* **104**, 4383-4388 (2007).
4. K. R. Benjamin, C. Zhang, K. M. Shokat, I. Herskowitz, Control of landmark events in meiosis by the CDK Cdc28 and the meiosis-specific kinase Ime2. *Genes Dev.* **17**, 1524-1539 (2003).
5. T. Tamguney, C. Zhang, D. Fiedler, K. Shokat, D. Stokoe, Analysis of 3-phosphoinositide-dependent kinase-1 signaling and function in ES cells. *Exp. Cell. Res.* **314**, 2299-2312 (2008).
6. Y. Liu, C. Kung, J. Fishburn, A. Z. Ansari, K. M. Shokat, S. Hahn, Two cyclin-dependent kinases promote RNA polymerase II transcription and formation of the scaffold complex. *Mol. Cell Biol.* **24**, 1721-1735 (2004).
7. B. Bodenmiller, L. N. Mueller, M. Mueller, B. Domon, R. Aebersold, Reproducible isolation of distinct, overlapping segments of the phosphoproteome. *Nat. Methods* **4**, 231-237 (2007).
8. A. Keller, A. I. Nesvizhskii, E. Kolker, R. Aebersold, Empirical statistical model to estimate the accuracy of peptide identifications made by MS/MS and database search. *Anal. Chem.* **74**, 5383-5392 (2002).
9. J. E. Elias, S. P. Gygi, Target-decoy search strategy for increased confidence in large-scale protein identifications by mass spectrometry. *Nat. Methods* **4**, 207-214 (2007).
10. S. A. Beausoleil, J. Villen, S. A. Gerber, J. Rush, S. P. Gygi, A probability-based approach for high-throughput protein phosphorylation analysis and site localization. *Nat. Biotechnol.* **24**, 1285-1292 (2006).
11. P. J. Ulintz, B. Bodenmiller, P. C. Andrews, R. Aebersold, A. I. Nesvizhskii, Investigating MS2/MS3 matching statistics: a model for coupling consecutive stage mass spectrometry data for increased peptide identification confidence. *Mol. Cell. Proteomics* **7**, 71-87 (2008).
12. B. Bodenmiller, D. Campbell, B. Gerrits, H. Lam, M. Jovanovic, P. Picotti, R. Schlapbach, R. Aebersold, PhosphoPep--a database of protein phosphorylation sites in model organisms. *Nat. Biotechnol.* **26**, 1339-1340 (2008).
13. B. Bodenmiller, J. Malmstrom, B. Gerrits, D. Campbell, H. Lam, A. Schmidt, O. Rinner, L. N. Mueller, P. T. Shannon, P. G. Pedrioli, C. Panse, H. K. Lee, R. Schlapbach, R. Aebersold, PhosphoPep--a phosphoproteome resource for systems biology research in *Drosophila* Kc167 cells. *Mol. Syst. Biol.* **3**, 139 (2007).
14. L. N. Mueller, O. Rinner, A. Schmidt, S. Letarte, B. Bodenmiller, M. Y. Brusniak, O. Vitek, R. Aebersold, M. Muller, SuperHirn - a novel tool for high resolution LC-MS-based peptide/protein profiling. *Proteomics* **7**, 3470-3480 (2007).
15. M. Y. Brusniak, B. Bodenmiller, D. Campbell, K. Cooke, J. Eddes, A. Garbutt, H. Lau, S. Letarte, L. N. Mueller, V. Sharma, O. Vitek, N. Zhang, R. Aebersold, J. D. Watts, Corra: Computational framework and tools for LC-MS discovery and targeted mass spectrometry-based proteomics. *BMC Bioinformatics* **9**, 542 (2008).
16. G. Smyth, Linear Models and Empirical Bayes Methods for Assessing Differential Expression in Microarray Experiments. *Stat. Appl. Gen. Mol. Biol.* **3**, Article 3 (2004).
17. M. Y. Brusniak, B. Bodenmiller, D. Campbell, K. Cooke, J. Eddes, A. Garbutt, H. Lau, S. Letarte, L. N. Mueller, V. Sharma, O. Vitek, N. Zhang, R. Aebersold, J. D. Watts, Corra: Computational framework and tools for LC-MS discovery and targeted mass spectrometry-based proteomics. *BMC Bioinformatics* **9**, 542 (2008).
18. G. K. Smyth, J. Michaud, H. S. Scott, Use of within-array replicate spots for assessing differential expression in microarray experiments. *Bioinformatics* **21**, 2067-2075 (2005).
19. Y. Benjamini, Y. Hochberg, Controlling The False Discovery Rate - Practical And Powerful Approach To Multiple Testing. *J. R. Stat. Soc. Ser. B-Methodol.* **57**, 289-300 (1995).

20. Y. Benjamini, D. Yekutieli, The control of the false discovery rate in multiple testing under dependency. *Annal. Stat.* (2001).
21. L. Shi, L. H. Reid, W. D. Jones, R. Shippy, J. A. Warrington, S. C. Baker, P. J. Collins, F. de Longueville, E. S. Kawasaki, K. Y. Lee, Y. Luo, Y. A. Sun, J. C. Willey, R. A. Setterquist, G. M. Fischer, W. Tong, Y. P. Dragan, D. J. Dix, F. W. Frueh, F. M. Goodsaid, D. Herman, R. V. Jensen, C. D. Johnson, E. K. Lobenhofer, R. K. Puri, U. Schrf, J. Thierry-Mieg, C. Wang, M. Wilson, P. K. Wolber, L. Zhang, S. Amur, W. Bao, C. C. Barbacioru, A. B. Lucas, V. Bertholet, C. Boysen, B. Bromley, D. Brown, A. Brunner, R. Canales, X. M. Cao, T. A. Cebula, J. J. Chen, J. Cheng, T. M. Chu, E. Chudin, J. Corson, J. C. Corton, L. J. Croner, C. Davies, T. S. Davison, G. Delenstarr, X. Deng, D. Dorris, A. C. Eklund, X. H. Fan, H. Fang, S. Fulmer-Smentek, J. C. Fuscoe, K. Gallagher, W. Ge, L. Guo, X. Guo, J. Hager, P. K. Haje, J. Han, T. Han, H. C. Harbottle, S. C. Harris, E. Hatchwell, C. A. Hauser, S. Hester, H. Hong, P. Hurban, S. A. Jackson, H. Ji, C. R. Knight, W. P. Kuo, J. E. LeClerc, S. Levy, Q. Z. Li, C. Liu, Y. Liu, M. J. Lombardi, Y. Ma, S. R. Magnuson, B. Maqsodi, T. McDaniel, N. Mei, O. Myklebost, B. Ning, N. Novoradovskaya, M. S. Orr, T. W. Osborn, A. Papallo, T. A. Patterson, R. G. Perkins, E. H. Peters, R. Peterson, K. L. Phillips, P. S. Pine, L. Pusztai, F. Qian, H. Ren, M. Rosen, B. A. Rosenzweig, R. R. Samaha, M. Schena, G. P. Schroth, S. Shchegrova, D. D. Smith, F. Staedtler, Z. Su, H. Sun, Z. Szallasi, Z. Tezak, D. Thierry-Mieg, K. L. Thompson, I. Tikhonova, Y. Turpaz, B. Vallanat, C. Van, S. J. Walker, S. J. Wang, Y. Wang, R. Wolfinger, A. Wong, J. Wu, C. Xiao, Q. Xie, J. Xu, W. Yang, S. Zhong, Y. Zong, W. Slikker, Jr., The MicroArray Quality Control (MAQC) project shows inter- and intraplatform reproducibility of gene expression measurements. *Nat. Biotechnol.* **24**, 1151-1161 (2006).
22. A. Gordon, A. Colman-Lerner, T. E. Chin, K. R. Benjamin, R. C. Yu, R. Brent, Single-cell quantification of molecules and rates using open-source microscope-based cytometry. *Nat. Methods* **4**, 175-181 (2007).
23. Y. Ohya, J. Sese, M. Yukawa, F. Sano, Y. Nakatani, T. L. Saito, A. Saka, T. Fukuda, S. Ishihara, S. Oka, G. Suzuki, M. Watanabe, A. Hirata, M. Ohtani, H. Sawai, N. Frayse, J. P. Latge, J. M. Francois, M. Aebi, S. Tanaka, S. Muramatsu, H. Araki, K. Sonoike, S. Nogami, S. Morishita, High-dimensional and large-scale phenotyping of yeast mutants. *Proc. Natl. Acad. Sci. USA* **102**, 19015-19020 (2005).
24. M. E. Hillenmeyer, E. Fung, J. Wildenhain, S. E. Pierce, S. Hoon, W. Lee, M. Proctor, R. P. St Onge, M. Tyers, D. Koller, R. B. Altman, R. W. Davis, C. Nislow, G. Giaever, The chemical genomic portrait of yeast: uncovering a phenotype for all genes. *Science* **320**, 362-365 (2008).
25. A. L. Oberg, O. Vitek, Statistical design of quantitative mass spectrometry-based proteomic experiments. *J. Proteome Res.* **8**, 2144-2156 (2009).
26. S. Ghaemmaghami, W. K. Huh, K. Bower, R. W. Howson, A. Belle, N. Dephoure, E. K. O'Shea, J. S. Weissman, Global analysis of protein expression in yeast. *Nature* **425**, 737-741 (2003).
27. M. Weiss, S. Schrimpf, M. O. Hengartner, M. J. Lercher, C. von Mering, Shotgun proteomics data from multiple organisms reveals remarkable quantitative conservation of the eukaryotic core proteome. *Proteomics* **10**, 1297-1306.
28. L. J. Jensen, M. Kuhn, M. Stark, S. Chaffron, C. Creevey, J. Muller, T. Doerks, P. Julien, A. Roth, M. Simonovic, P. Bork, C. von Mering, STRING 8--a global view on proteins and their functional interactions in 630 organisms. *Nucleic Acids Res.* **37**, D412-416 (2009).
29. J. M. Cherry, C. Ball, S. Weng, G. Juvik, R. Schmidt, C. Adler, B. Dunn, S. Dwight, L. Riles, R. K. Mortimer, D. Botstein, Genetic and physical maps of *Saccharomyces cerevisiae*. *Nature* **387**, 67-73 (1997).
30. D. Fiedler, H. Braberg, M. Mehta, G. Chechik, G. Cagney, P. Mukherjee, A. C. Silva, M. Shales, S. R. Collins, S. van Wageningen, P. Kemmeren, F. C. Holstege, J. S. Weissman, M. C. Keogh, D. Koller, K. M. Shokat, N. J. Krogan, Functional organization of the *S. cerevisiae* phosphorylation network. *Cell* **136**, 952-963 (2009).
31. C. Stark, T. C. Su, A. Breitkreutz, P. Lourenco, M. Dahabieh, B. J. Breitkreutz, M. Tyers, I. Sadowski, PhosphoGRID: a database of experimentally verified *in vivo* protein

phosphorylation sites from the budding yeast *Saccharomyces cerevisiae*. *Database* **58**, (2010).
